# Supplementary material for: Catalytic enantioselective intramolecular Tishchenko reaction of meso-dialdehyde: synthesis of (S)-cedarmycins
Source: Royal Society of Chemistry journal article supplement (doi:10.1039/d1ra00915j), 2021-01-01

## Electronic Supplementary Information (ESI):

# Catalytic Enantioselective Tishchenko Reaction of meso-Dialdehyde: Synthesis of (S)-Cedarmycins

Ismiyarto,<sup>a</sup> Nobuki Kishi,<sup>b</sup> Yuki Adachi,<sup>a</sup> Rui Jiang,<sup>a</sup> Takahiro Doi,<sup>a</sup> Da-Yang Zhou,<sup>a</sup> Kaori Asano,<sup>a</sup> Yasushi Obora,<sup>b</sup> Takayoshi Suzuki,<sup>a</sup> Hiroaki Sasai,<sup>a</sup> and Takeyuki Suzuki<sup>\*a</sup>

<sup>a</sup>*The Institute of Scientific and Industrial Research, Osaka University, Mihogaoka, Ibaraki, Osaka 567-0047, Japan.*

<sup>b</sup>*Department of Chemistry and Materials Engineering, Faculty of Chemistry, Materials, and Bioengineering, Kansai University, Suita, Osaka 564-8680, Japan*

*E-mail: suzuki-t@sanken.osaka-u.ac.jp*

### Table of Contents

|    |                                                              |     |
|----|--------------------------------------------------------------|-----|
| 1. | General.....                                                 | S2  |
| 2. | Experimental Section.....                                    | S2  |
| 3. | ESI-MS of the Ir complex.....                                | S5  |
| 4. | Determination of the structure by X-ray Crystallography..... | S8  |
| 5. | HPLC Chart.....                                              | S11 |
| 6. | NMR Spectra.....                                             | S14 |

## Experimental Procedures

### 1. General

Melting points were obtained with a Yanagimoto Micro Melting Point Apparatus and are uncorrected. Infrared (IR) spectra were recorded on a JASCO FT/IR 4100 spectrometer.  $^1\text{H}$  NMR spectra were recorded on JEOL JNM-ECS400 NMR or JEOL JNM-ECA600 NMR or Bruker Avance III 700 NMR spectrometer. The chemical shifts are reported in ppm on the  $\delta$  scale downfield from tetramethylsilane or relative to the residual solvent signals ( $\text{CDCl}_3$ : 7.26 ppm for  $^1\text{H}$  NMR and 77.16 for  $^{13}\text{C}$  NMR,  $\text{CD}_2\text{Cl}_2$ : 5.32 ppm for  $^1\text{H}$  NMR and 53.84 for  $^{13}\text{C}$  NMR,  $\text{CD}_3\text{OD}$ : 3.31 ppm for  $^1\text{H}$  NMR and 49.00 for  $^{13}\text{C}$  NMR), and signal patterns are indicated as follows: s, singlet; d, doublet; t, triplet; m, multiplet; br, broad peak.  $^{13}\text{C}$  NMR spectra were measured on a JEOL JNM-ECA600 NMR spectrometer at 151 MHz or Bruker Avance III 176 NMR spectrometer at 176 MHz. APCI or ESI mass spectra were recorded on a THERMO LTQ Orbitrap XL spectrometer. CSI mass spectra were recorded on a Bruker micrOTOF II spectrometer. X-ray crystallographic analyses were conducted on a Rigaku E-Axis RAPID 191R diffractometer system equipped with a Rigaku FR-E<sup>++</sup> SuperBright (Cu) X-ray generator or a Rigaku XtaLAB PRO MM007 DW diffractometer system equipped with a MicroMax007HFMDW(Cu/Mo) X-ray generator and a HyPix-6000HE detector. Optical rotations were measured with JASCO P-2300 polarimeter. HPLC analyses were performed on SHIMADZU HPLC system (SHIMADZU LC20 AD pump and SPD-M20A PDA detector). Anhydrous THF and methanol were purchased from Kanto Chemicals and used without any purification. Other solvents were purified prior to use by standard techniques. 5% Pd/C (N.E.Chemcat NX type) was purchased and used without any purification.

### 2. Experimental section

#### Intramolecular Tishchenko Reaction of Aromatic Dialdehyde (Table 1)

The mixture of **6** (0.15 mmol),  $\text{K}_2\text{CO}_3$  (4.1 mg, 0.03 mmol, 20 mol %), 0.6 M *i*-PrOH in  $\text{CH}_2\text{Cl}_2$  solution (0.05 mL, 0.03 mmol, 20 mol %), and **5a** (0.81 mg, 0.015 mmol, 1 mol %) in  $\text{CH}_2\text{Cl}_2$  (1 mL) was stirred at 30 °C for 7 h under Ar atmosphere. The mixture was passed through a short silica gel column (ethyl acetate) to remove the catalyst and concentrated under reduced pressure. Chemical yield was determined using 1,1,2,2-tetrachloroethane as internal standard. The crude mixture was purified by silica gel column chromatography (hexane/ethyl acetate = 1/1) to give the desired product.

#### phthalide (**7a**)<sup>[1]</sup>

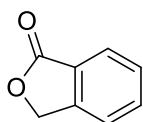

**7a**

white solid 19.5 mg, 97%.

$^1\text{H}$ -NMR (700MHz,  $\text{CDCl}_3$ )  $\delta$ : 7.93 (d,  $J$  = 7.7 Hz, 1H), 7.70 (td,  $J$  = 7.4, 1.0 Hz, 1H), 7.55 (td,  $J$  = 7.5, 0.9 Hz, 1H), 7.52 (dt,  $J$  = 7.7, 0.9 Hz, 1H), 5.34 (s, 2H).

$^{13}\text{C}$ -NMR (176MHz,  $\text{CDCl}_3$ )  $\delta$ : 171.3, 146.6, 134.1, 129.1, 125.81, 125.78, 122.2, 69.8.

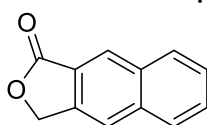

**7b**

#### naphtho[2,3-c]furan-1(3H)-one (**7b**)<sup>[2]</sup>

white solid 26.8 mg, 97%.

$^1\text{H}$ -NMR (700MHz,  $\text{CDCl}_3$ )  $\delta$ : 8.52 (s, 1H), 8.06 (d,  $J$  = 8.6 Hz, 1H), 7.95 (d,  $J$  = 8.2 Hz, 1H), 7.92 (s, 1H), 7.68-7.66 (m, 1H), 7.62-7.60 (m, 1H), 5.50 (s, 2H).

$^{13}\text{C}$ -NMR (176MHz,  $\text{CDCl}_3$ )  $\delta$ : 171.2, 140.1, 136.4, 133.2, 130.1, 129.2, 128.3, 127.2, 127.1, 123.5, 121.0, 69.8.

#### (1*R*,7*S*,8*S*,9*R*)-4,4-diphenyl-3,5-dioxabicyclo[5.2.0]nonane-8,9-diol (**9**)

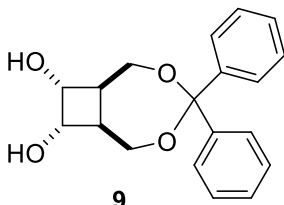

**9**

*cis*-3-Cyclobutene-1,2-dimethanol **8**<sup>[3]</sup> (1.385 g, 12.1 mmol) and diphenyl diazomethane (2.361 g, 12.1 mmol) in 96 mL of 1,2-dichloroethane were slowly added to a solution of 2,3-dichloro-5,6-dicyano-1,4-benzoquinone (DDQ) (2.758 g, 12.1 mmol) in 55 mL of 1,2-dichloroethane at room temperature. The mixture was stirred for 1 h and the reaction mixture was concentrated in vacuo. The concentrate was dissolved in toluene and the solution was washed with saturated  $\text{NaHCO}_3$ . The organic layer was passed through on short column silica gel and concentrated in vacuo in order to give crude acetal product as a yellow oil (3.378 g crude product).

To a cooled (0 °C) solution of crude acetal (12.1 mmol) in acetone- $\text{H}_2\text{O}$  (10:1, 125 mL) was added *N*-methylmorpholine-*N*-oxide (4.27 g, 36.5 mmol) and a solution of osmium tetroxide in  $\text{tBuOH}$  (0.04 M, 15.2 mL, 0.607 mmol). The reaction mixture was allowed to warm to ambient temperature over 10 min and stirred at 30 °C for 30 min and the reaction was quenched by the addition of saturated aqueous  $\text{Na}_2\text{S}_2\text{O}_3$  7.18 g (36.5 mmol). After stirring for 20 min, the layers were separated and the aqueous layer was extracted with AcOEt. The combined organic layers were washed with brine, dried over  $\text{Na}_2\text{SO}_4$ , and concentrated in vacuo. The resulting oil was purified by flash chromatography (30:70 EtOAc-hexanes) to afford **9** as a white solid (2.21 g, 58% in two steps).

MP 178 °C

$^1\text{H}$ -NMR (700MHz,  $\text{CDCl}_3$ )  $\delta$ : 7.59-7.55 (m, 4H), 7.28 (t,  $J$  = 7.7 Hz, 4H), 7.21-7.20 (m, 2H), 4.17 (s, 2H), 3.82 (dd,  $J$  = 12.9, 6.5 Hz, 2H), 3.65-3.63 (br m, 2H), 3.11 (d,  $J$  = 3.4 Hz, 2H), 2.48-2.48 (m, 2H).

<sup>13</sup>C-NMR (176MHz, CDCl<sub>3</sub>) δ: 144.1, 143.2, 128.3(2C), 127.7(2C), 126.4(4C), 126.3(4C), 105.0(2C), 68.5(2C), 62.1 (2C).  
IR(KBr): 3277, 3023, 2939, 1054, 1031, 1012 cm<sup>-1</sup>  
APCI-HRMS. Calcd for C<sub>19</sub>H<sub>20</sub>O<sub>4</sub> [M+Na]<sup>+</sup>: 335.1259. Found: 335.1254.

### Synthesis of *meso*-Dialdehyde **10**

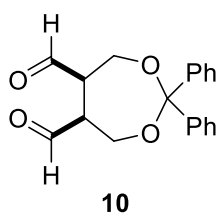

To a vigorously stirred suspension of silica gel-supported NaO<sub>4</sub><sup>[4]</sup> (666 mg, 0.448 mmol, 2 equiv) was added a solution of the diol **9** (70 mg, 0.224 mmol) in CH<sub>2</sub>Cl<sub>2</sub> (2.24 mL, 0.1 M). The reaction was monitored by TLC until disappearance of the starting material (generally 10-30 min). The mixture was filtered through a sintered glass funnel, and the silica gel was thoroughly washed with CH<sub>2</sub>Cl<sub>2</sub> to total volume 10 mL. The chemical yield (72%) was determined by <sup>1</sup>H-NMR using tetrachloroethane as an internal standard. For Tishchenko reaction in the table 2, the residue obtained by evaporation of the CH<sub>2</sub>Cl<sub>2</sub> solution was used quickly by addition of CH<sub>2</sub>Cl<sub>2</sub> or CH<sub>3</sub>CN. The sample for the NMR measurement was prepared in the same manner except for using CD<sub>2</sub>Cl<sub>2</sub> instead of CH<sub>2</sub>Cl<sub>2</sub>.

<sup>1</sup>H-NMR (700MHz, CD<sub>2</sub>Cl<sub>2</sub>) δ: 9.75 (s, 2H), 7.56 (d, *J* = 7.3 Hz, 2H), 7.47 (d, *J* = 7.3 Hz, 2H), 7.31 (t, *J* = 7.7 Hz, 2H), 7.27 (t, *J* = 7.5 Hz, 2H), 7.25 (t, *J* = 7.3 Hz, 1H), 7.22 (t, *J* = 7.3 Hz, 1H), 4.12 (s, 4H), 3.01 (s, 2H).  
<sup>13</sup>C-NMR (176MHz, CD<sub>2</sub>Cl<sub>2</sub>) δ: 200.3 (2C), 143.3, 143.1, 128.57 (2C), 128.55 (2C), 128.20, 128.16, 126.5 (2C), 126.3 (2C), 104.7, 61.0 (2C), 52.8 (2C).  
IR(KBr): 1730 cm<sup>-1</sup>  
ESI-HRMS. Calcd for C<sub>19</sub>H<sub>18</sub>O<sub>4</sub> [M+Na]<sup>+</sup>: 333.1103. Found: 333.1097.

### Enantioselective Tishchenko reaction of **10** (Table 2, entry 4)

To a 0.14 M solution of **10** in CH<sub>2</sub>Cl<sub>2</sub> (0.46 mL, 0.0644 mmol) was added **5b** (4.5 mg, 0.0065 mmol, 10 mol %), K<sub>2</sub>CO<sub>3</sub> (3.6 mg, 0.0261 mmol, 40 mol %), (PhO)<sub>2</sub>PO<sub>2</sub>H (6.4 mg, 0.0256 mmol, 40 mol %) and 0.6 M *i*-PrOH in CH<sub>2</sub>Cl<sub>2</sub> solution (0.0214 mL, 0.0128 mmol, 20 mol %) and then the mixture was stirred at 30 °C for 24 h under Ar atmosphere. The mixture was passed through a short silica gel column (ethyl acetate) to remove the catalyst and concentrated under reduced pressure. Then crude mixture was purified by silica gel column chromatography (hexane/ ethyl acetate = 85/15) to give the lactone **11** as a white solid (15.6 mg, 78% and 91% ee). The optically pure lactone was prepared from the recrystallization from hexane and ethyl acetate.

### (5*a*S,8*a*R)-3,3-diphenyltetrahydro-1*H*,6*H*-furo[3,4-*e*][1,3]dioxepin-6-one (**11**)

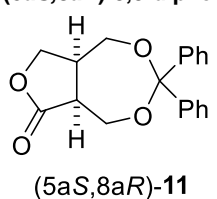

MP 212 °C  
<sup>1</sup>H-NMR (700MHz, CDCl<sub>3</sub>) δ: 7.58-7.53 (m, 4H), 7.32-7.26 (m, 4H), 7.25-7.20 (m, 2H), 4.28 (dd, *J* = 9.5, 6.5 Hz, 1H), 4.23 (d, *J* = 12.7 Hz, 1H), 3.99 (m, 1H), 3.93 (dd, *J* = 12.7, 3.2 Hz, 1H), 3.79 (dd, *J* = 12.5, 4.7 Hz, 1H), 3.68 (dd, *J* = 12.5, 10.8 Hz, 1H), 2.95-2.93 (m, 1H), 2.80-2.80 (m, 1H).  
<sup>13</sup>C-NMR (176MHz, CDCl<sub>3</sub>) δ: 176.5, 142.9, 142.7, 128.38 (2C), 128.32 (2C), 128.0, 127.9, 126.37 (2C), 126.35 (2C), 104.6, 67.5, 61.9, 59.6, 44.5, 39.1.  
IR(KBr): 1777 cm<sup>-1</sup>

APCI-HRMS. Calcd for C<sub>19</sub>H<sub>18</sub>O<sub>4</sub> [M+Na]<sup>+</sup>: 333.1103. Found: 333.1097.  
[α]<sub>D</sub><sup>28</sup> -165.1 ° (c 1.0, CHCl<sub>3</sub>, >99% ee).

### Preparation of *meso*-Diol **12**

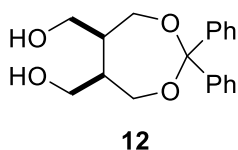

To a CH<sub>2</sub>Cl<sub>2</sub> solution of *meso*-dialdehyde **10** (99.3 mg, 0.320 mmol) was added MeOH (1.4 mL), then NaBH<sub>4</sub> (16 mg, 0.422 mmol) was added and stirred at the 30 °C for 24 h. The mixture was quenched by sat. NH<sub>4</sub>Cl and extracted with AcOEt, then the organic layer was washed with sat. NaHCO<sub>3</sub> and brine, dried over Na<sub>2</sub>SO<sub>4</sub>. The organic layer was evaporated under reduced pressure to give the desired product **12** as a colorless liquid (88.6 mg, 88% yield).

<sup>1</sup>H-NMR (600MHz, CDCl<sub>3</sub>) <sup>1</sup>H-NMR (CDCl<sub>3</sub>) δ: 7.56-7.54 (m, 4H), 7.30-7.26 (m, 4H), 7.21 (t, *J* = 6.9 Hz, 2H), 3.80 (m, 8H), 2.66 (s, 2H), 2.14 (m, 2H).  
<sup>13</sup>C-NMR (150MHz, CDCl<sub>3</sub>) δ: 143.66, 143.60, 128.20 (2C), 128.1 (2C), 127.58, 127.54, 126.16 (2C), 126.01 (2C), 103.9, 64.5 (2C), 62.6 (2C), 43.24 (2C).  
IR(KBr): cm<sup>-1</sup> 3273 cm<sup>-1</sup>  
APCI-HRMS. Calcd for C<sub>17</sub>H<sub>15</sub>O<sub>2</sub> [M+Na]<sup>+</sup>: 337.1416. Found: 337.1411.

### Enantioselective Oxidative Lactonization of *meso*-Diol **12**

A mixture of Ir complex **5b** (36.3 mg, 0.0525 mmol, 5 mol %), K<sub>2</sub>CO<sub>3</sub> (14.5 mg, 0.105 mmol) and diol **12** (329.7 mg, 1.05 mmol) in acetone (5.3 mL) was stirred at 30 °C. After 86 h the resulting solution was passed through a short column chromatography (SiO<sub>2</sub>, AcOEt) and evaporated, and the residue was purified by column chromatography (SiO<sub>2</sub>, hexane/AcOEt, 1:1) to give **11** (300 mg, 92% as a white solid).

### (3*R*,4*S*)-3,4-bis(hydroxymethyl)dihydrofuran-2(3*H*)-one(*cis*-**14**)

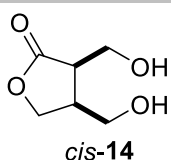

To a solution of (5*aR*, 8*aS*)-lactone **11** (35 mg, 0.11 mmol) in  $\text{CHCl}_3$  (0.7 mL) and  $\text{CF}_3\text{CH}_2\text{OH}$  (0.7 mL) was added 5% Pd/C (24 mg, 0.011 mmol) and stirred at 15 °C for 6 h under  $\text{H}_2$  (0.6 MPa). The mixture was filtered by membrane and concentrated under reduced pressure at less than 30 °C. The crude product was purified by silica gel column chromatography (hexane/ ethyl acetate = 1/2, then 0/1) to give the desired product **14** (15.7 mg, 95%, as a colorless oil).

$^1\text{H-NMR}$  (700MHz,  $\text{CD}_3\text{OD}$ )  $\delta$ : 4.36 (dd,  $J = 8.7, 7.2$  Hz, 1H), 4.26 (dd,  $J = 9.0, 3.8$  Hz, 1H), 3.92 (dd,  $J = 11.3, 4.0$  Hz, 1H), 3.85 (dd,  $J = 11.3, 7.1$  Hz, 1H), 3.80 (dd,  $J = 11.1, 5.0$  Hz, 1H), 3.71 (dd,  $J = 11.1, 6.3$  Hz, 1H), 2.92-2.91 (m, 1H), 2.81-2.77 (m, 1H).

$^{13}\text{C-NMR}$  (175MHz,  $\text{CD}_3\text{OD}$ )  $\delta$ : 180.0, 71.6, 61.0, 59.2, 45.3, 40.8.

IR(KBr): 3377, 1759 $\text{cm}^{-1}$

APCI-HRMS. Calcd for  $\text{C}_6\text{H}_{10}\text{O}_4$   $[\text{M}+\text{H}]^+$ : 147.0657. Found: 147.0649.

$[\alpha]_{\text{D}}^{25} +34.2^\circ$  (c 0.63, AcOEt).

### Synthesis of cedarmicine A (15a)

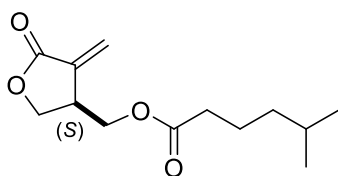

To a solution of **14** (8.4 mg, 0.0575 mmol) in 0.15 mL DCM was added 2,6-lutidine (26.6  $\mu\text{L}$ , 0.23 mmol), DMAP (4.21 mg, 0.0345 mmol) and 5-methylhexanoylchloride<sup>[5]</sup> (35.5  $\mu\text{L}$ , 0.23 mmol) and stirred at 30 °C for 24 h, then DBU (43  $\mu\text{L}$ , 0.288 mmol) was added and stirred for 20 h. The mixture was quenched by  $\text{NH}_4\text{Cl}$ , then extracted with EtOAc. After dried with  $\text{Na}_2\text{SO}_4$  and evaporated, the crude product was purified by preparative thin layer column chromatography (hexane/ ethyl acetate) to give Cedarmicin A (**15a**) 10.5 mg (76% yield).

$^1\text{H-NMR}$  (600MHz,  $\text{CDCl}_3$ )  $\delta$ : 6.39 (d,  $J = 2.7$  Hz, 1H), 5.77 (d,  $J = 2.1$  Hz, 1H), 4.48 (t,  $J = 8.9$  Hz, 1H), 4.25 (dd,  $J = 11.0, 5.5$  Hz, 1H), 4.19-4.16 (m, 2H), 3.44-3.44 (m, 1H), 2.31 (t,  $J = 7.6$  Hz, 2H), 1.64-1.54 (m, 3H), 1.20-1.17 (m, 2H), 0.88 (d,  $J = 6.2$  Hz, 6H).

$^{13}\text{C-NMR}$  (150MHz,  $\text{CDCl}_3$ )  $\delta$ : 173.7, 170.1, 134.7, 124.4, 68.3, 64.9, 38.5, 38.2, 34.5, 27.9, 22.9, 22.6 (2C).

$[\alpha]_{\text{D}}^{28} +42.0$  (c 0.35,  $\text{CHCl}_3$ , 94% ee), lit.  $[\alpha]_{\text{D}}^{28} +29.2$  (c 1.00,  $\text{CHCl}_3$ )<sup>[6]</sup>.

### Cedarmicine B (15b)

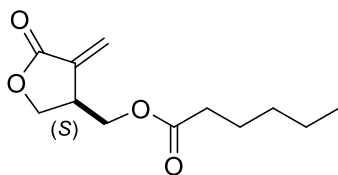

To a solution of **14** (9.5 mg, 0.065 mmol) in 0.15 mL DCM was added 2,6-lutidine (30  $\mu\text{L}$ , 0.26 mmol), DMAP (4.8 mg, 0.039 mmol) and hexanoylchloride (36  $\mu\text{L}$ , 0.26 mmol) and stirred at 30 °C for 20 h, then DBU (49  $\mu\text{L}$ , 0.33 mmol) was added and stirred for 4 h. The mixture was quenched by  $\text{NH}_4\text{Cl}$ , then extracted with EtOAc. After dried with  $\text{Na}_2\text{SO}_4$  and evaporated, the crude product was purified by preparative thin layer column chromatography (hexane/ ethyl acetate) to give Cedarmicin B (**15b**) 12.5 mg (85% yield).

$^1\text{H-NMR}$  ( $\text{CDCl}_3$ )  $\delta$ : 6.38 (1H, d,  $J = 2.7$  Hz), 5.76 (1H, d,  $J = 1.4$  Hz), 4.48 (1H, t,  $J = 8.9$  Hz), 4.25 (1H, dd,  $J = 11.0, 5.5$  Hz), 4.19-4.14 (2H, m), 3.46-3.42 (1H, m), 2.32 (2H, t,  $J = 7.6$  Hz), 1.64-1.59 (2H, m), 1.36-1.25 (4H, m), 0.90 (3H, t,  $J = 6.5$  Hz).

$^1\text{H-NMR}$  (600MHz,  $\text{CDCl}_3$ )  $\delta$ : 6.39 (d,  $J = 2.1$  Hz, 1H), 5.77 (d,  $J = 2.1$  Hz, 1H), 4.48 (t,  $J = 8.9$  Hz, 1H), 4.25 (dd,  $J = 11.7, 5.5$  Hz, 1H), 4.20-4.15 (m, 2H), 3.45-3.43 (m, 1H), 2.32 (t,  $J = 7.6$  Hz, 2H), 1.64-1.60 (m, 2H), 1.32-1.30 (m, 4H), 0.90 (t,  $J = 6.9$  Hz, 3H).

$^{13}\text{C-NMR}$  (176MHz,  $\text{CDCl}_3$ )  $\delta$ : 173.7, 170.0, 134.6, 124.4, 68.3, 64.8, 38.2, 34.2, 31.4, 24.7, 22.4, 14.1.

$[\alpha]_{\text{D}}^{28} +39.5$  (c 0.30,  $\text{CHCl}_3$ , 94% ee), lit  $[\alpha]_{\text{D}}^{28} +11.7$  (c 0.30,  $\text{CHCl}_3$ )<sup>[6]</sup>

## References

- 1 P.-C. Qian, Y. Liu, R.-J. Song, M. Hu, X.-H. Yang, J.-N. Xiang and J.-H. Li, *Eur. J. Org. Chem.*, 2015, **2015**, 1680-1684.
- 2 Y. H. Zhang, B. F. Shi and J. Q. Yu, *Angew. Chem. Int. Ed. Engl.*, 2009, **48**, 6097-6100.
- 3 (a) J. I. Brauman and W. C. Archie, *J. Am. Chem. Soc.*, 1972, **94**, 4262-4265; (b) F. Binns, R. Hayes, S. Ingham, S. T. Saengchantara, R. W. Turner and T. W. Wallace, *Tetrahedron*, 1992, **48**, 515-530; (c) N. Gauvry, C. Comoy, C. Lescop and F. Huet, *Synthesis*, 1999, **1999**, 574-576.
- 4 Y. L. Zhong and T. K. Shing, *J. Org. Chem.*, 1997, **62**, 2622-2624.
- 5 R. A. Coats, S. L. Lee, K. A. Davis, K. M. Patel, E. K. Rhoads and M. H. Howard, *J. Org. Chem.*, 2004, **69**, 1734-1737.
- 6 T. Sasaki, Y. Igarashi, N. Saito and T. Furumai, *J. Antibiot.*, 2001, **54**, 567-572.

### 3. CSI-MS of the Ir complex.

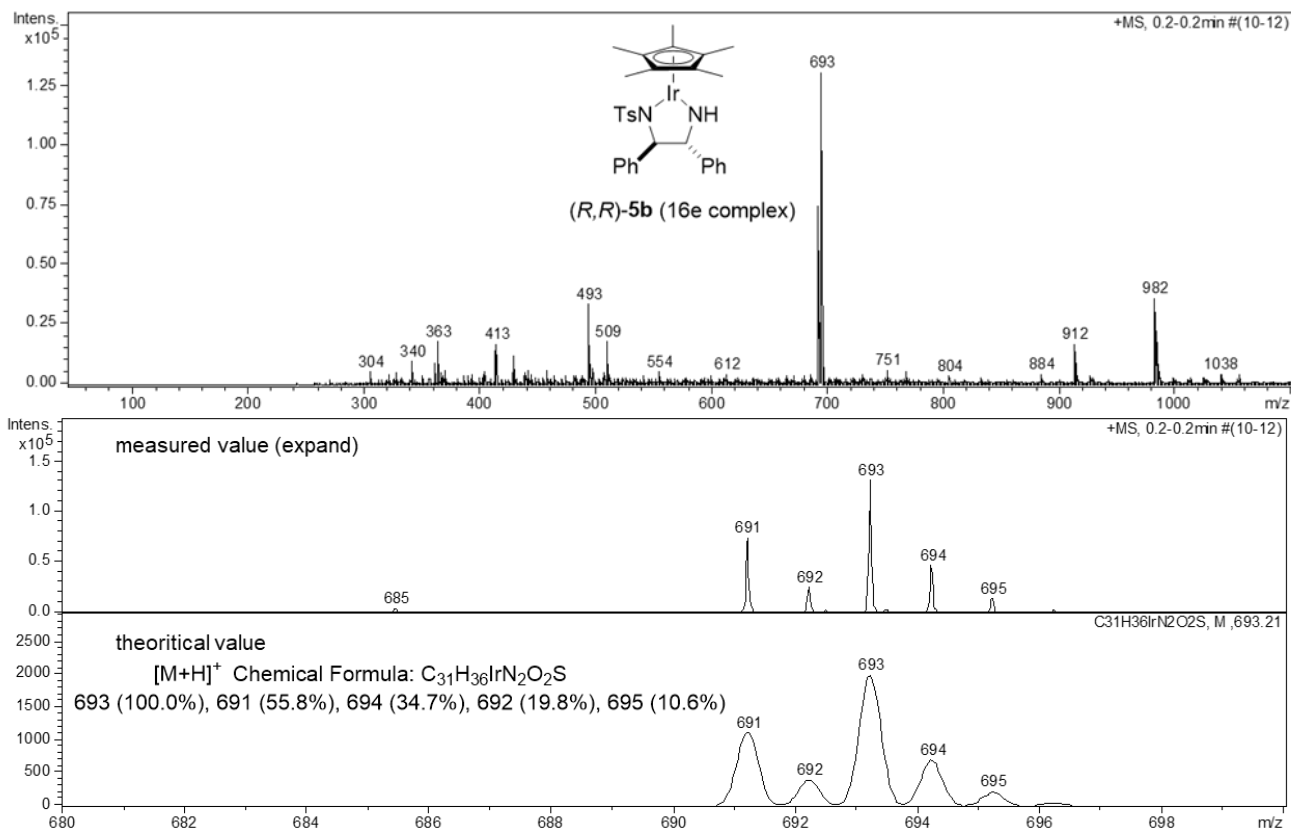

**Figure S1.** CSI-MS spectrum of Cp\*IrTsDPEN in DCM/CH<sub>3</sub>CN

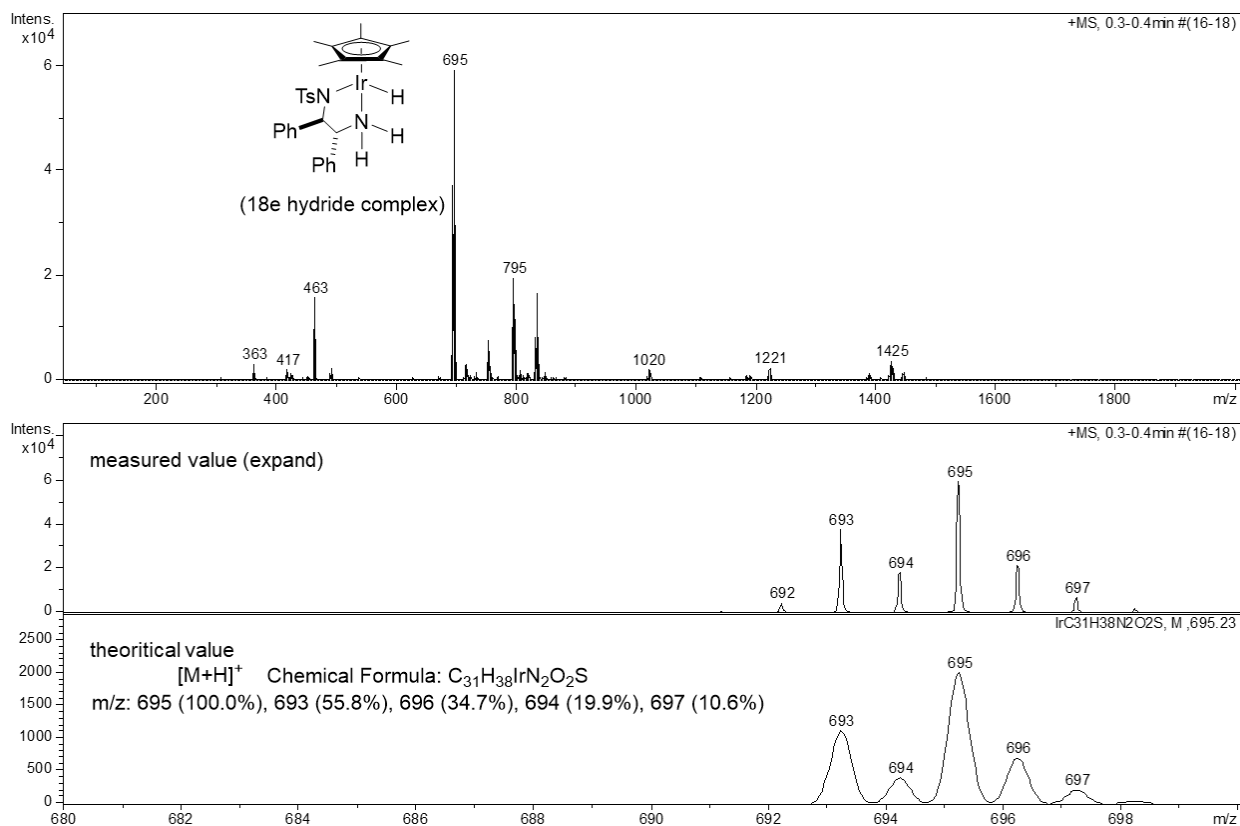

**Figure S2.** CSI-MS spectrum of Cp\*IrTsDPEN in *i*-PrOH.

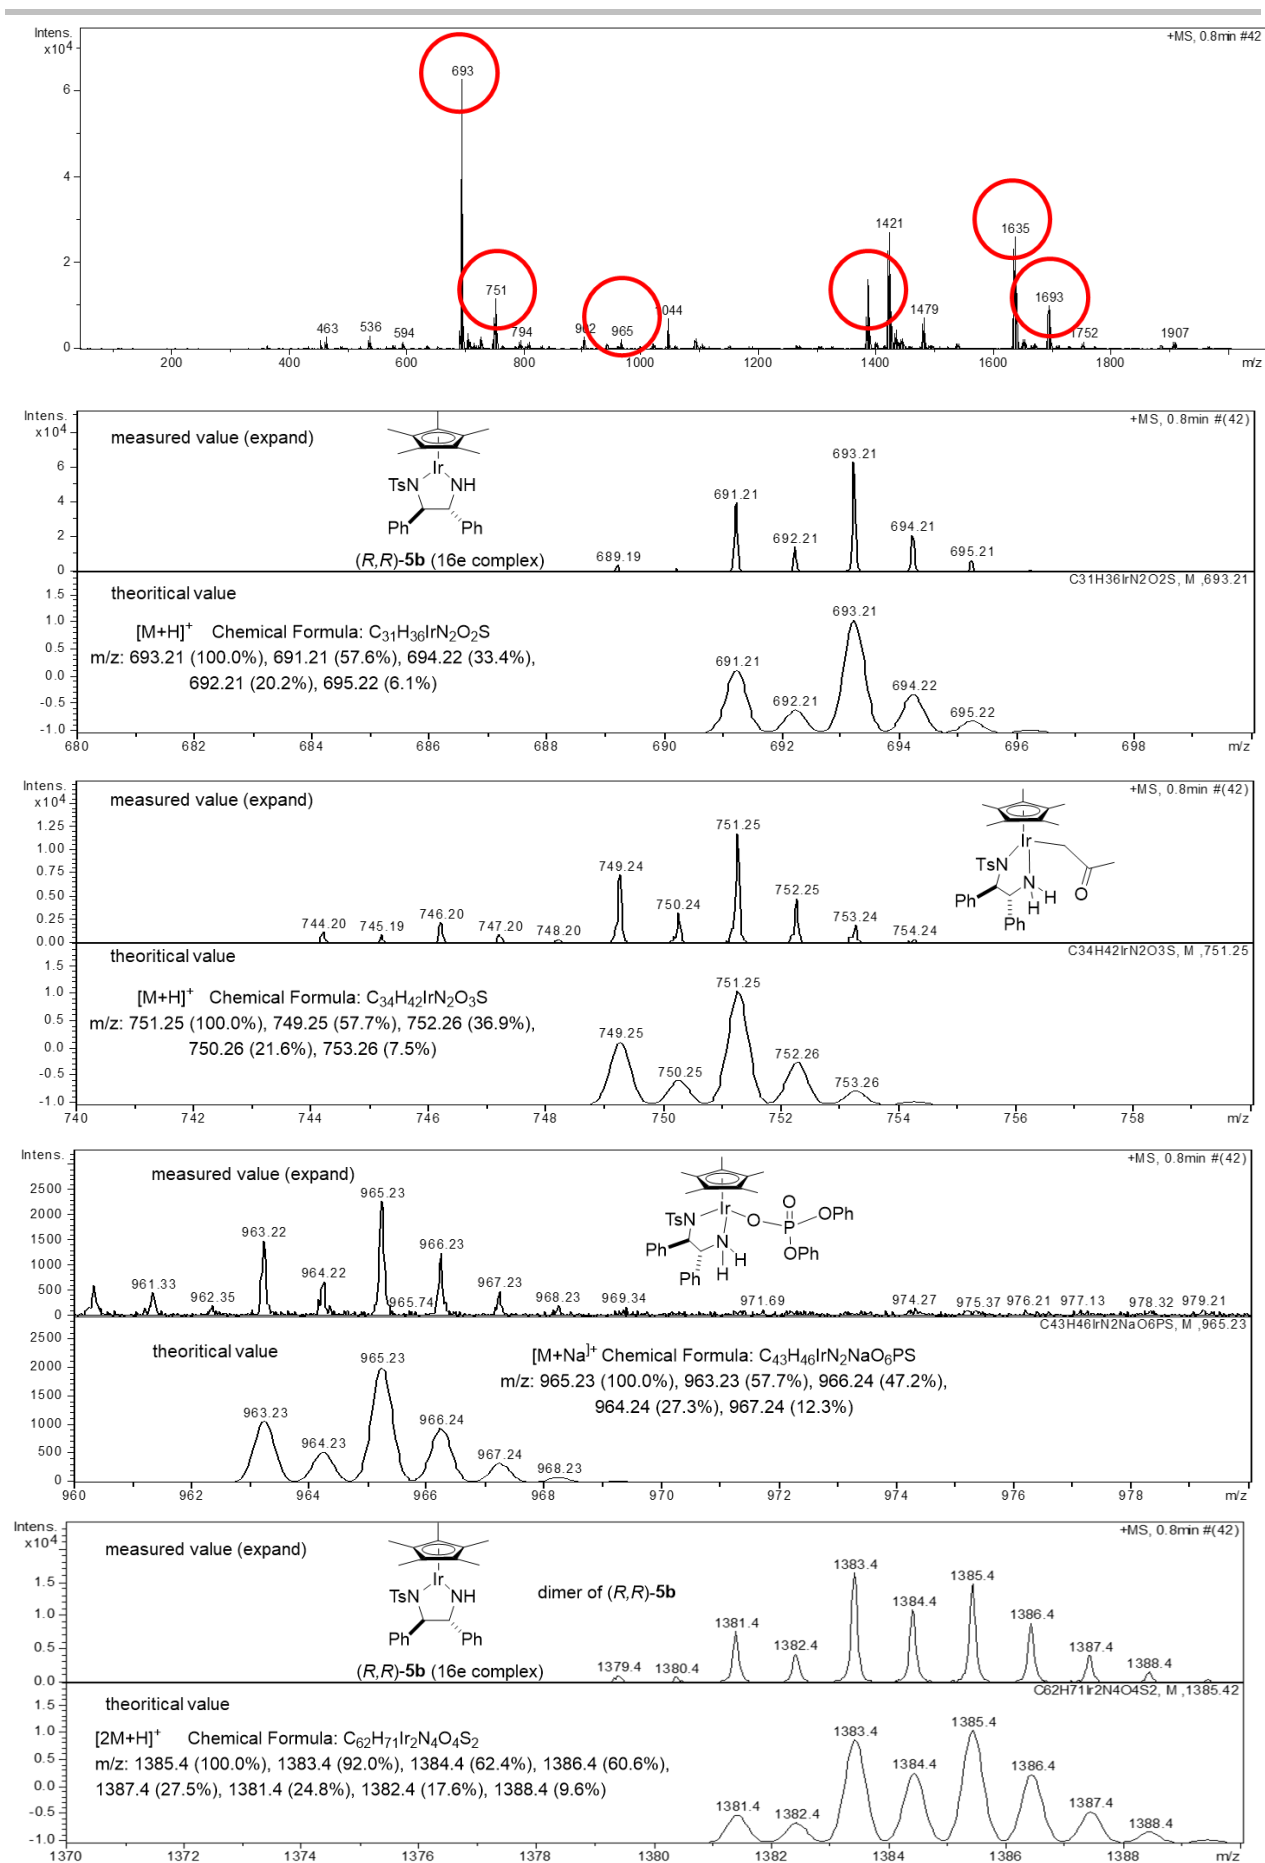

Figure S3. CSI-MS spectrum of a mixture of Cp\*IrTsDPEN, (PhO)<sub>2</sub>PO<sub>2</sub>H (1equiv), K<sub>2</sub>CO<sub>3</sub> (1equiv) in DCM/ *i*-PrOH.

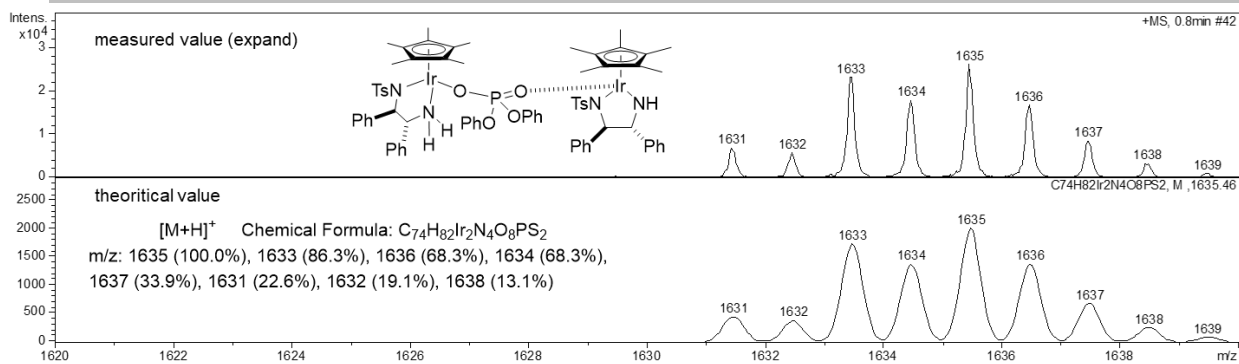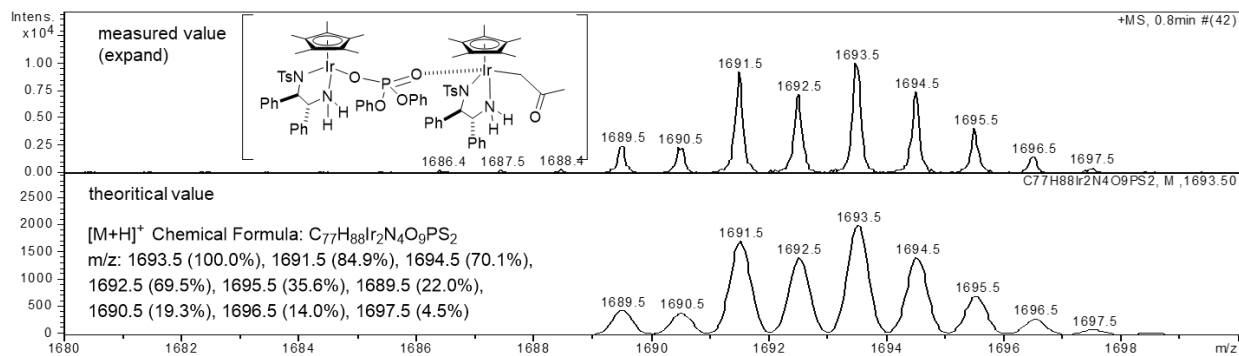

#### 4. Determination of the structure by X-ray Crystallography

The CS Analysis of diol **9**

Diol **3** (in dichloromethane and hexane) was treated with a single crystal of  $[(ZnI_2)_3(tpt)_2]$  complex [CS crystal; tpt = 2,4,6-tris(4-pyridyl)triazine], **9** and the guest-absorbed CS crystal was subjected to a diffraction study. ORTEP diagram of the asymmetric unit is shown in Figure S1.

CCDC 2019330 contain the supplementary crystallographic data for this paper. These data can be obtained free of charge from The Cambridge Crystallographic Data Centre via [www.ccdc.cam.ac.uk/data\\_request/cif](http://www.ccdc.cam.ac.uk/data_request/cif)

Figure S1. Asymmetric unit of the  $9 \cdot [(ZnI_2)_3(tpt)_2]$  inclusion complex. Solvent (dichloromethane) and hydrogens have been removed for clarity.

Figure S2. Diol **9**; ellipsoids are at 50% probability

**Experimental.** A Single colourless rod-shaped crystals was attached to a capton film on an Rigaku XtaLAB PRO diffractometer. The crystal was kept at a steady  $T = 100.15$  K during data collection. The structure was solved with the **ShelXT** (Sheldrick, 2015) structure solution program using the Intrinsic Phasing solution method and by using **Olex2** (Dolomanov et al., 2009) as the graphical interface. The model was refined with version 2018/3 of **ShelXL** (Sheldrick, 2015) using Least Squares minimisation.

|                             |                                             |
|-----------------------------|---------------------------------------------|
| Formula                     | $C_{56.25}H_{46.5}Cl_{2.5}I_6N_{12}O_4Zn_3$ |
| $D_{calc}/g\ cm^{-3}$       | 1.703                                       |
| $\mu/mm^{-1}$               | 20.865                                      |
| Formula Weight              | 2000.69                                     |
| Colour                      | colourless                                  |
| Shape                       | rod                                         |
| Size/ $mm^3$                | 0.15x0.08x0.06                              |
| $T/K$                       | 100.15                                      |
| Crystal System              | monoclinic                                  |
| Space Group                 | $P2/c$                                      |
| $a/\text{\AA}$              | 34.9669(3)                                  |
| $b/\text{\AA}$              | 14.81360(10)                                |
| $c/\text{\AA}$              | 30.7587(2)                                  |
| $\alpha^\circ$              | 90                                          |
| $\beta^\circ$               | 101.5970(10)                                |
| $\gamma^\circ$              | 90                                          |
| $V/\text{\AA}^3$            | 15607.3(2)                                  |
| $Z$                         | 8                                           |
| $Z'$                        | 2                                           |
| Wavelength/ $\text{\AA}$    | 1.54184                                     |
| Radiation type              | $CuK\alpha$                                 |
| $\theta_{min}^\circ$        | 2.580                                       |
| $\theta_{max}^\circ$        | 80.472                                      |
| Measured Refl.              | 320208                                      |
| Independent Refl.           | 32630                                       |
| Reflections with $I > 2(I)$ | 25738                                       |
| $R_{int}$                   | 0.0879                                      |
| Parameters                  | 1690                                        |
| Restraints                  | 923                                         |
| Largest Peak                | 1.993                                       |
| Deepest Hole                | -1.209                                      |
| GooF                        | 1.225                                       |
| $wR_2$ (all data)           | 0.3029                                      |
| $wR_2$                      | 0.2857                                      |
| $R_1$ (all data)            | 0.0976                                      |
| $R_1$                       | 0.0884                                      |

#### Structure Quality Indicators

|              |                 |                 |                 |                           |
|--------------|-----------------|-----------------|-----------------|---------------------------|
| Reflections: | d min (Cu) 0.78 | $I/\sigma$ 29.0 | $R_{int}$ 8.79% | complete 100% (IUCr) 100% |
| Refinement:  | Shift -0.001    | Max Peak 2.0    | Min Peak -1.2   | GooF 1.225                |



A colorless rod-shaped crystal with dimensions 0.15x0.08x0.06 mm<sup>3</sup> was attached to a Kapton film. Data were collected using a Rigaku XtaLAB PRO diffractometer operating at  $T = 100.15$  K.

Data were measured using  $\omega$  scans using CuK $\alpha$  radiation. The total number of runs and images was based on the strategy calculation from the program **CrysAlisPro** (Rigaku, V1.171.40.35a, 2018) The maximum resolution that was achieved was  $\theta = 80.472^\circ$  (0.78 Å).

The diffraction pattern was indexed. The total number of runs and images was based on the strategy calculation from the program **CrysAlisPro** (Rigaku, V1.171.40.35a, 2018) and the unit cell was refined using **CrysAlisPro** (Rigaku, V1.171.40.35a, 2018) on 97276 reflections, 30% of the observed reflections.

Data reduction, scaling and absorption corrections were performed using **CrysAlisPro** (Rigaku, V1.171.40.35a, 2018). The final completeness is 100.00 % out to  $80.472^\circ$  in  $\theta$ . A gaussian absorption correction was performed using CrysAlisPro 1.171.40.35a (Rigaku Oxford Diffraction, 2018) Numerical absorption correction based on gaussian integration over a multifaceted crystal model Empirical absorption correction using spherical harmonics as implemented in SCALE3 ABSPACK. The absorption coefficient  $\mu$  of this material is 20.865 mm<sup>-1</sup> at this wavelength ( $\lambda = 1.542\text{Å}$ ) and the minimum and maximum transmissions are 0.005 and 0.156.

The structure was solved and the space group  $P2/c$  (# 13) determined by the **ShelXT** (Sheldrick, 2015) structure solution program using Intrinsic Phasing and refined by Least Squares using version 2018/3 of **ShelXL** (Sheldrick, 2015). All non-hydrogen atoms were refined anisotropically. Hydrogen atom positions were calculated geometrically and refined using the riding model. Hydrogen atom positions were calculated geometrically and refined using the riding model.

*\_exptl\_absorpt\_process\_details*: CrysAlisPro 1.171.40.35a (Rigaku Oxford Diffraction, 2018) Numerical absorption correction based on gaussian integration over a multifaceted crystal model Empirical absorption correction using spherical harmonics as implemented in SCALE3 ABSPACK.

The value of  $Z'$  is 2. This means that there are two independent molecules in the asymmetric unit.

*Crystal structure of (5aS,8aR)-11*

CCDC 2022569 contain the supplementary crystallographic data for this paper. These data can be obtained free of charge from The Cambridge Crystallographic Data Centre via [www.ccdc.cam.ac.uk/data\\_request/cif](http://www.ccdc.cam.ac.uk/data_request/cif)

#### A. Crystal Data

Empirical Formula C<sub>19</sub>H<sub>18</sub>O<sub>4</sub>  
Formula Weight 310.35  
Crystal Color, Habit colorless, block  
Crystal Dimensions 0.136 X 0.082 X 0.077 mm  
Crystal System orthorhombic  
Lattice Type Primitive  
Lattice Parameters a = 8.91118(16) Å  
b = 11.0174(2) Å  
c = 15.8907(11) Å  
V = 1560.12(12) Å<sup>3</sup>  
Space Group P2<sub>1</sub>2<sub>1</sub>2<sub>1</sub> (#19)  
Z value 4  
D<sub>calc</sub> 1.321 g/cm<sup>3</sup>  
F<sub>000</sub> 656.00  
 $\mu$ (CuK $\alpha$ ) 7.545 cm<sup>-1</sup>

#### B. Intensity Measurements

Diffractometer R-AXIS RAPID 191R  
Radiation CuK $\alpha$  ( $\lambda = 1.54187$  Å)  
Voltage, Current 45kV, 55mA  
Temperature -150.0oC  
Detector Aperture 783.0 x 382.0 mm  
Data Images 56 exposures  
 $\omega$  oscillation Range ( $\chi=54.0$ ,  $\Phi=0.0$ ) 80.0 - 255.0o  
Exposure Rate 3.0 sec./o  
 $\omega$  oscillation Range ( $\chi =54.0$ ,  $\Phi=60.0$ ) 80.0 - 255.0o  
Exposure Rate 3.0 sec./o  
 $\omega$  oscillation Range ( $\chi =54.0$ ,  $\Phi=120.0$ ) 80.0 - 255.0o  
Exposure Rate 3.0 sec./o  
 $\omega$  oscillation Range ( $\chi =54.0$ ,  $\Phi=180.0$ ) 80.0 - 255.0o  
Exposure Rate 3.0 sec./o  
 $\omega$  oscillation Range ( $\chi =54.0$ ,  $\Phi=240.0$ ) 80.0 - 255.0o  
Exposure Rate 3.0 sec./o  
 $\omega$  oscillation Range ( $\chi =54.0$ ,  $\Phi=320.0$ ) 80.0 - 255.0o  
Exposure Rate 3.0 sec./o

---

$\omega$  oscillation Range ( $\chi = 20.0$ ,  $\Phi = 0.0$ ) 80.0 - 255.0o  
Exposure Rate 3.0 sec./o  
 $\omega$  oscillation Range ( $\chi = 20.0$ ,  $\Phi = 120.0$ ) 80.0 - 255.0o  
Exposure Rate 3.0 sec./o  
Detector Position 191.00 mm  
Pixel Size 0.100 mm  
2 $\theta$ max 136.5o  
No. of Reflections Measured Total: 29839  
Unique: 2849 (Rint = 0.0327)  
Parsons quotients (Flack x parameter): 1068  
Corrections Lorentz-polarization  
Absorption  
(trans. factors: 0.822 - 0.944)  
Secondary Extinction  
(coefficient: 8.80000e-004)

### C. Structure Solution and Refinement

Structure Solution Direct Methods (SHELXT Version 2014/5)  
Refinement Full-matrix least-squares on F<sup>2</sup>  
Function Minimized  $\sum w (F_o^2 - F_c^2)^2$   
Least Squares Weights  $w = 1 / [ \sigma^2(F_o^2) + (0.0290 \cdot P)^2 + 0.3245 \cdot P ]$   
where  $P = (\text{Max}(F_o^2, 0) + 2F_c^2) / 3$   
2 $\theta$ max cutoff 136.5o  
Anomalous Dispersion All non-hydrogen atoms  
No. Observations (All reflections) 2849  
No. Variables 209  
Reflection/Parameter Ratio 13.63  
Residuals: R1 ( $I > 2.00\sigma(I)$ ) 0.0319  
Residuals: R (All reflections) 0.0342  
Residuals: wR2 (All reflections) 0.0707  
Goodness of Fit Indicator 1.090  
Flack parameter (Parsons' quotients = 1068) -0.13(6)  
Max Shift/Error in Final Cycle 0.000  
Maximum peak in Final Diff. Map 0.15 e-/Å<sup>3</sup>  
Minimum peak in Final Diff. Map -0.22 e-/Å<sup>3</sup>

## 5. HPLC Chart

### (5a*S*,8a*R*)-3,3-diphenyltetrahydro-1*H*,6*H*-furo[3,4-*e*][1,3]dioxepin-6-one (11)

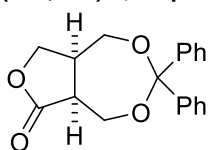

HPLC conditions: DAICEL CHIRALPAK IA-3, hexane/*i*-PrOH = 9/1, flow rate = 1.0 mL/min, detection 219 nm, retention time = 9.7 min (5a*R*,8a*S*) and 12.0 min (5a*S*,8a*R*).

#### (5a*S*,8a*R*)-11

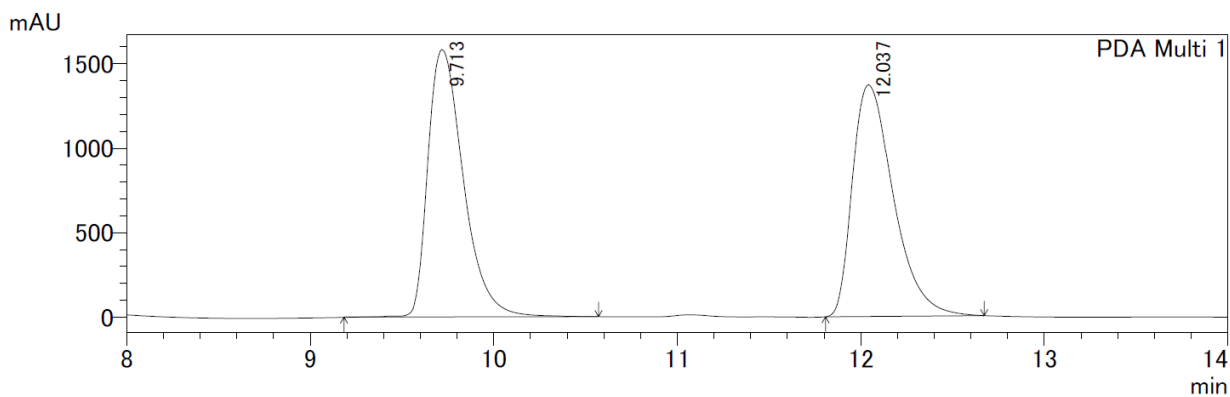

1 PDA Multi 1/219nm 4nm

PDA Ch1 219nm 4nm

| Peak # | Ret. Time | Area     | Area%   |
|--------|-----------|----------|---------|
| 1      | 9.713     | 21280689 | 49.941  |
| 2      | 12.037    | 21330816 | 50.059  |
| 合計     |           | 42611504 | 100.000 |

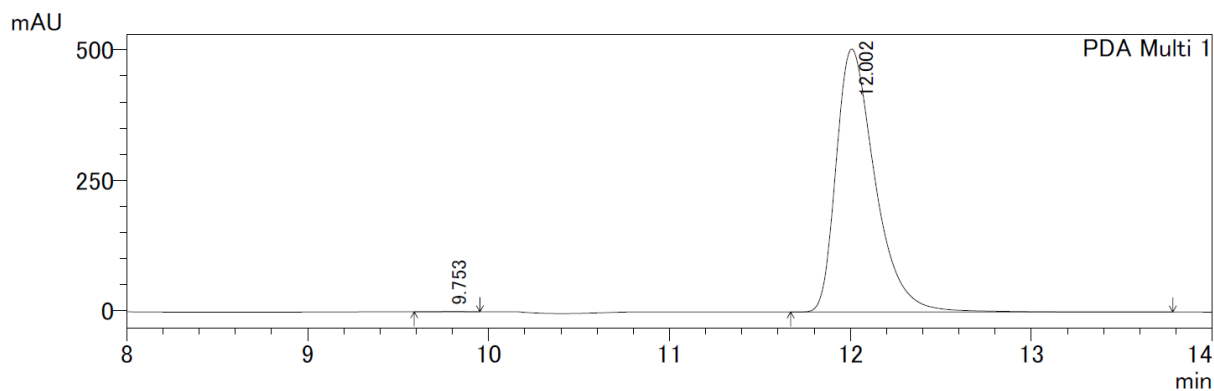

1 PDA Multi 1/219nm 4nm

PDA Ch1 219nm 4nm

| Peak # | Ret. Time | Area    | Area%   |
|--------|-----------|---------|---------|
| 1      | 9.753     | 5316    | 0.070   |
| 2      | 12.002    | 7548613 | 99.930  |
| 合計     |           | 7553929 | 100.000 |

**cedarmicine A (15a)**

HPLC conditions: DAICEL CHIRALPAK IC-3, hexane/*i*-PrOH = 8/2, flow rate =1.0 mL/min, detection 212 nm, retention time = 23 min (*R*) and 28 min (*S*).

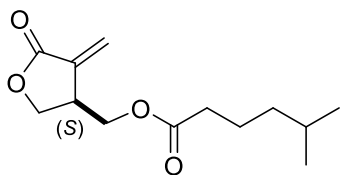

**15a:**Cedarmycin A

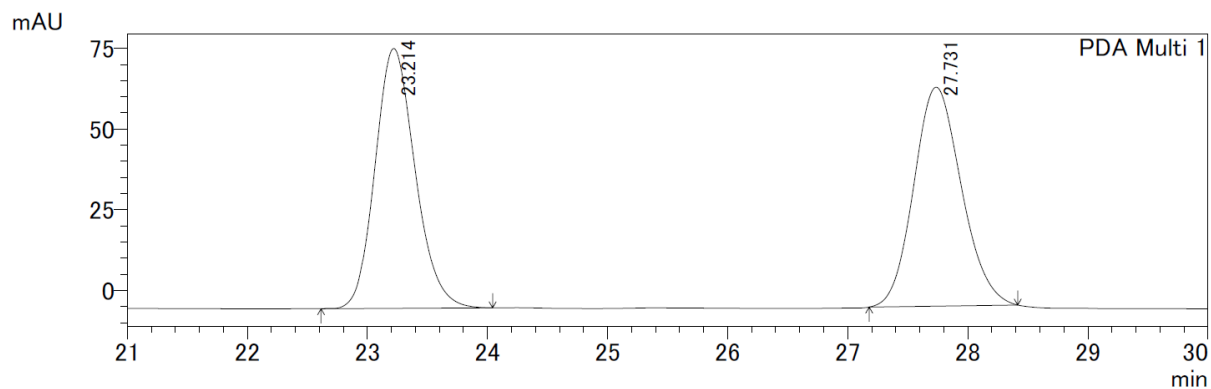

1 PDA Multi 1/212nm 4nm

PDA Ch1 212nm 4nm

| Peak# | Ret. Time | Area    | Area%   |
|-------|-----------|---------|---------|
| 1     | 23.214    | 1868099 | 49.964  |
| 2     | 27.731    | 1870758 | 50.036  |
| 合計    |           | 3738856 | 100.000 |

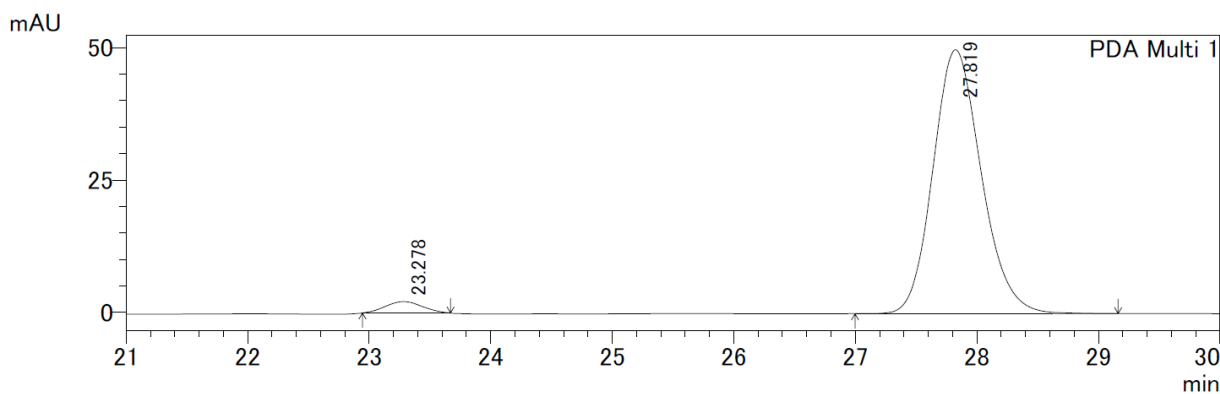

1 PDA Multi 1/212nm 4nm

PDA Ch1 212nm 4nm

| Peak# | Ret. Time | Area    | Area%   |
|-------|-----------|---------|---------|
| 1     | 23.278    | 45759   | 3.215   |
| 2     | 27.819    | 1377456 | 96.785  |
| 合計    |           | 1423215 | 100.000 |

**Cedarmicine B (15b)**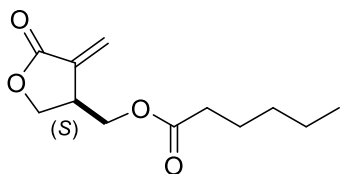**15b**: Cedarmycin B

HPLC conditions: DAICEL CHIRALPAK IC-3, hexane/*i*-PrOH = 8/2, flow rate = 1.0 mL/min, detection 212 nm, retention time = 31 min (*R*) and 37 min (*S*).

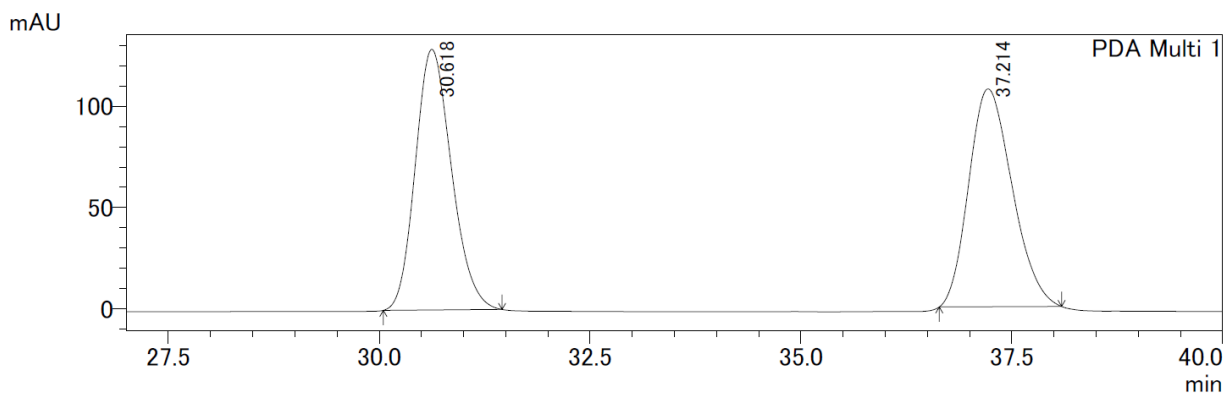

1 PDA Multi 1/212nm 4nm

PDA Ch1 212nm 4nm

| Peak # | Ret. Time | Area    | Area%   |
|--------|-----------|---------|---------|
| 1      | 30.618    | 3846776 | 49.924  |
| 2      | 37.214    | 3858489 | 50.076  |
| 合計     |           | 7705265 | 100.000 |

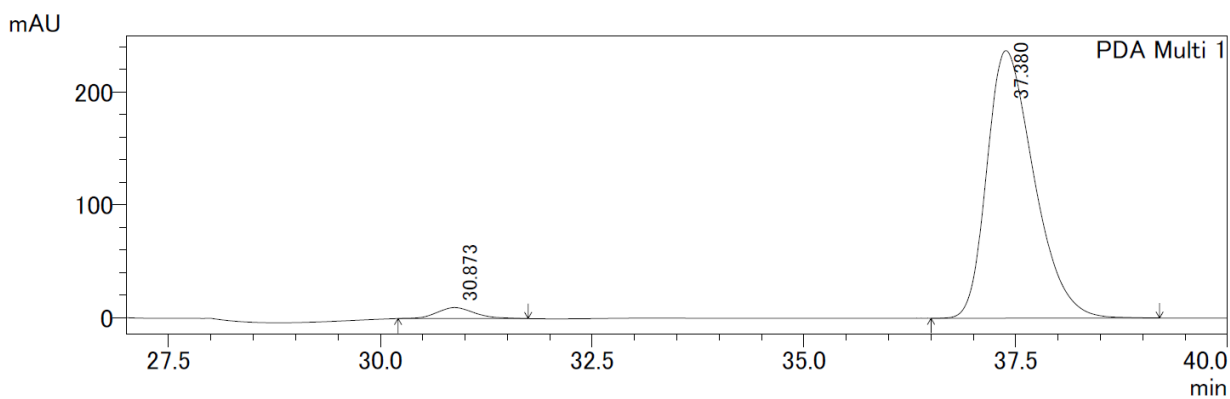

1 PDA Multi 1/212nm 4nm

PDA Ch1 212nm 4nm

| Peak # | Ret. Time | Area    | Area%   |
|--------|-----------|---------|---------|
| 1      | 30.873    | 289426  | 3.062   |
| 2      | 37.380    | 9162611 | 96.938  |
| 合計     |           | 9452037 | 100.000 |

## 6. NMR Spectra

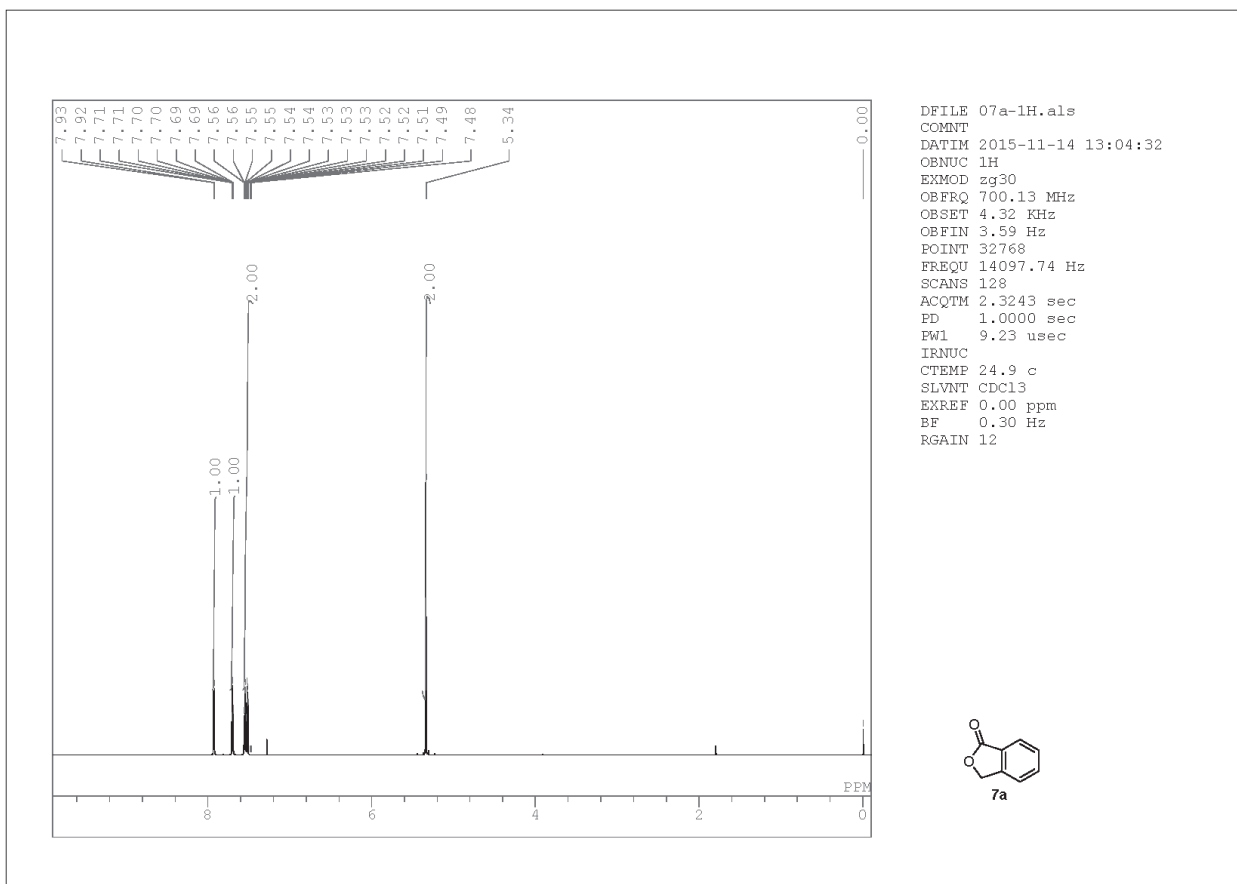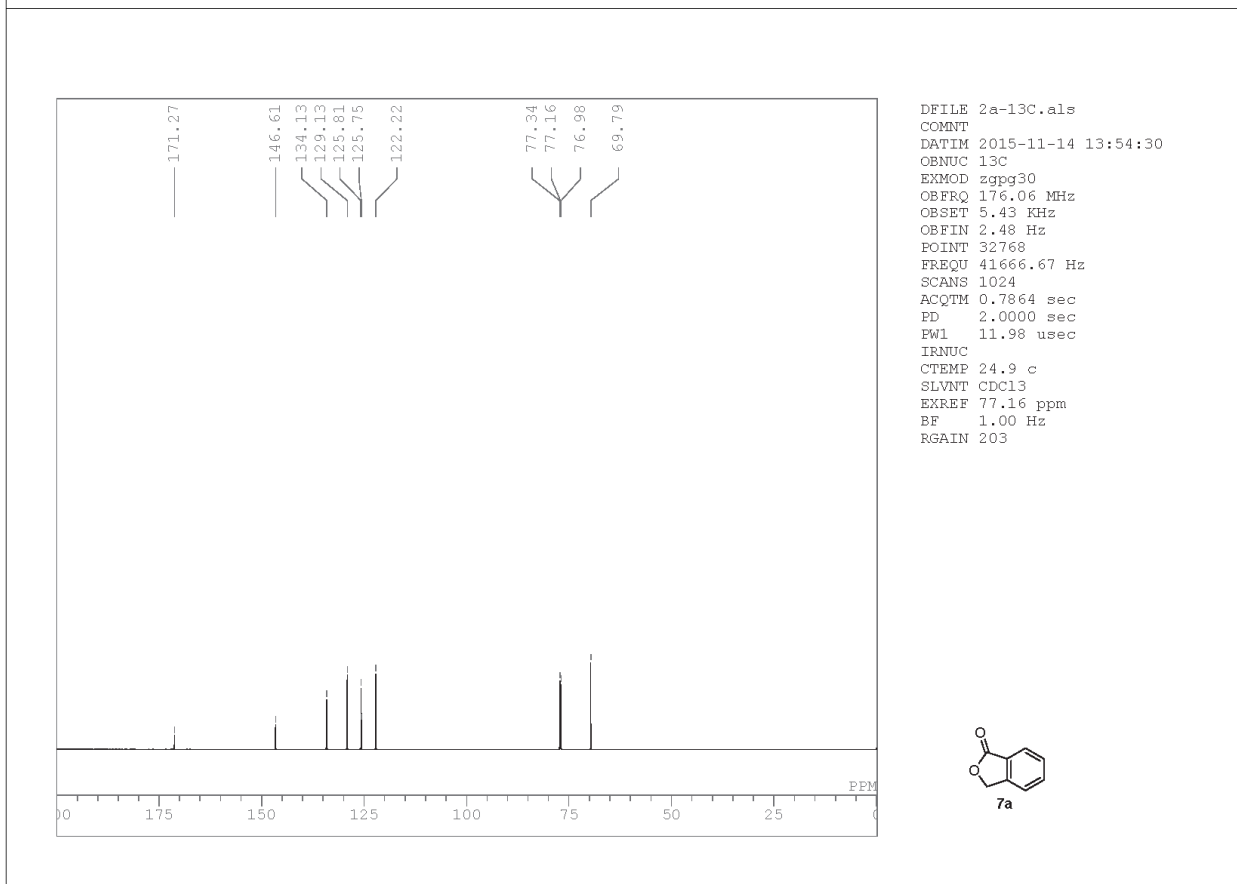

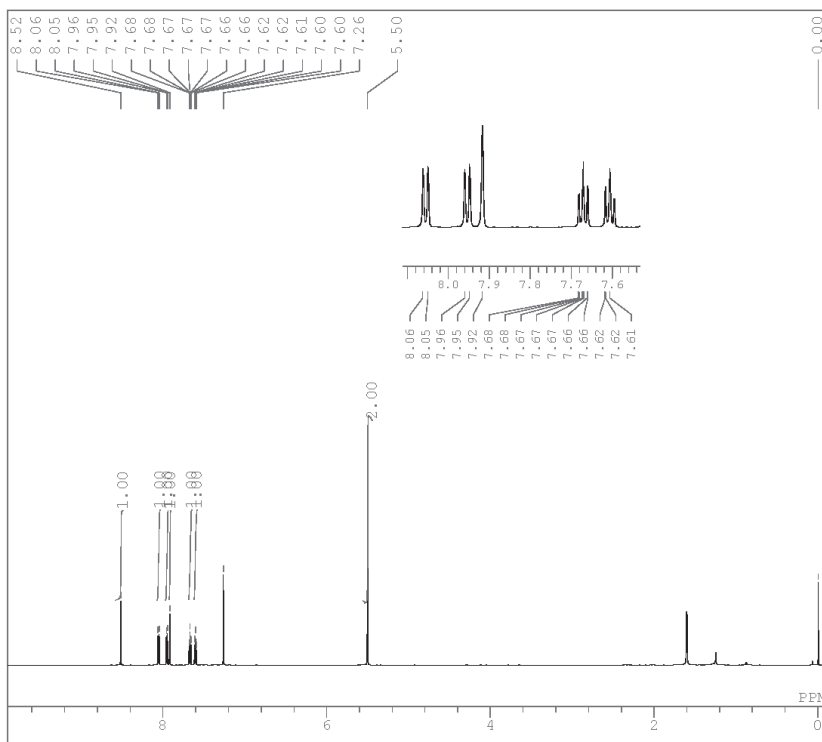

DFILE 07b-1H.als  
 COMNT  
 DATIM 2015-11-14 14:05:07  
 OBNUC 1H  
 EXMOD zg30  
 OBFRQ 700.13 MHz  
 OBSET 4.32 KHz  
 OFFIN 3.59 Hz  
 POINT 32768  
 FREQU 14097.74 Hz  
 SCANS 128  
 ACQTM 2.3243 sec  
 PD 1.0000 sec  
 PW1 9.23 usec  
 IRNUC  
 CTEMP 24.9 c  
 SLVNT CDCl3  
 EXREF 0.00 ppm  
 BF 0.30 Hz  
 RGAIN 18

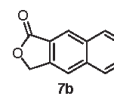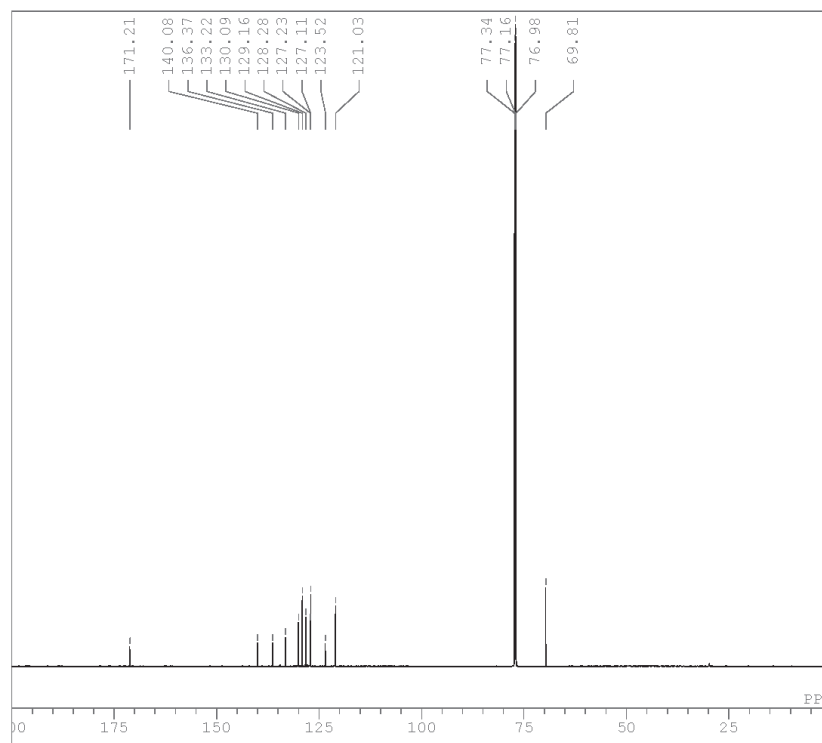

DFILE 2b-13C.als  
 COMNT  
 DATIM 2015-11-14 14:54:59  
 OBNUC 13C  
 EXMOD zgpg30  
 OBFRQ 176.06 MHz  
 OBSET 5.43 KHz  
 OFFIN 2.48 Hz  
 POINT 32768  
 FREQU 41666.67 Hz  
 SCANS 1024  
 ACQTM 0.7864 sec  
 PD 2.0000 sec  
 PW1 11.98 usec  
 IRNUC  
 CTEMP 24.9 c  
 SLVNT CDCl3  
 EXREF 77.16 ppm  
 BF 1.00 Hz  
 RGAIN 203

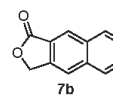

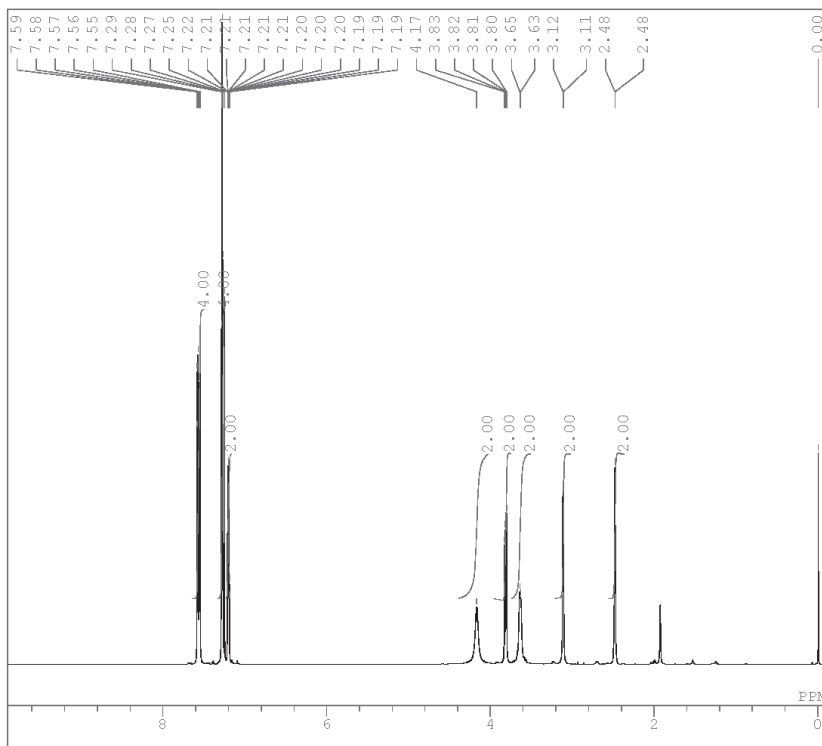

DFILE 09-1H.als  
 COMNT 1H NMR  
 DATIM 2015-09-15 22:58:14  
 OBNUC 1H  
 EXMOD zg30  
 OBFRO 700.13 MHz  
 OBSET 4.32 KHz  
 OBFIN 3.59 Hz  
 POINT 32768  
 FREQU 14097.74 Hz  
 SCANS 16  
 ACQTM 2.3243 sec  
 ED 1.0000 sec  
 FW1 9.23 usec  
 IRNUC  
 CTEMP 24.9 c  
 SLVNT CD2C12  
 EXREF 0.00 ppm  
 BF 0.30 Hz  
 RGAIN 11

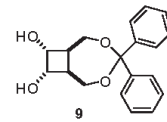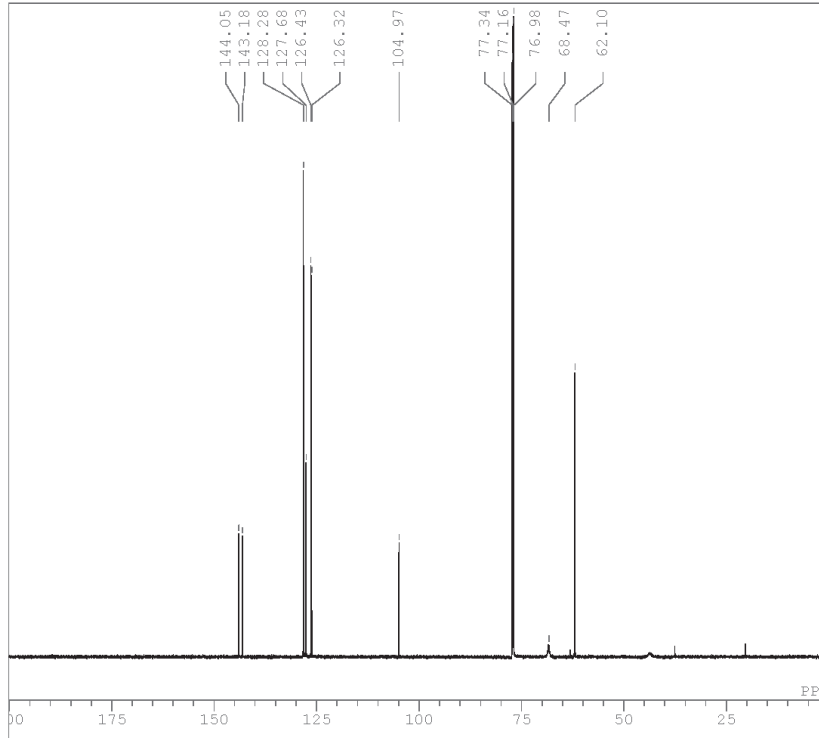

DFILE 09-13C(176).als  
 COMNT 13C NMR  
 DATIM 2015-09-15 23:04:51  
 OBNUC 13C  
 EXMOD zgpg30  
 OBFRO 176.06 MHz  
 OBSET 5.43 KHz  
 OBFIN 2.48 Hz  
 POINT 32768  
 FREQU 41666.67 Hz  
 SCANS 128  
 ACQTM 0.7843 sec  
 ED 2.0000 sec  
 FW1 11.98 usec  
 IRNUC  
 CTEMP 24.9 c  
 SLVNT CD2C12  
 EXREF 77.16 ppm  
 BF 1.00 Hz  
 RGAIN 203

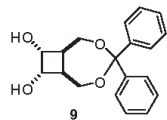



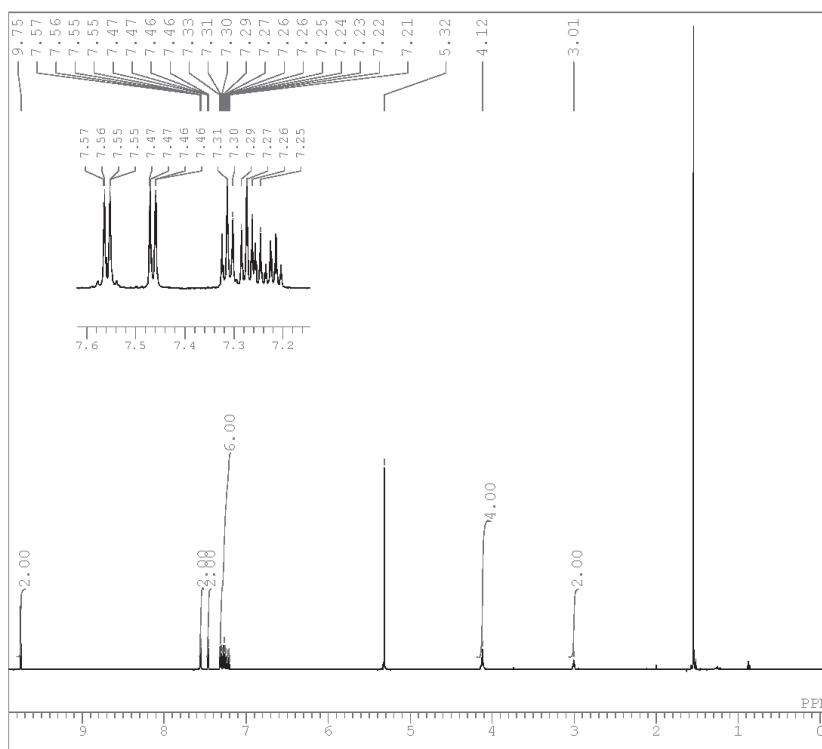

DFILE 10-1H(TD-1029).als  
 COMNT  
 DATIM 2015-11-17 06:44:37  
 OBNUC 1H  
 EXMOD zg30  
 OBFRQ 700.13 MHz  
 OBSET 4.32 KHz  
 OFFIN 3.59 Hz  
 POINT 65536  
 FREQU 14097.74 Hz  
 SCANS 16  
 ACQTM 0.0000 sec  
 ED 0.0000 sec  
 FW1 10.00 usec  
 IRNUC  
 CTEMP 24.9 c  
 SLVNT CD2C12  
 EXREF 5.32 ppm  
 BF 0.10 Hz  
 RGAIN 16

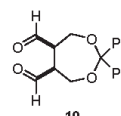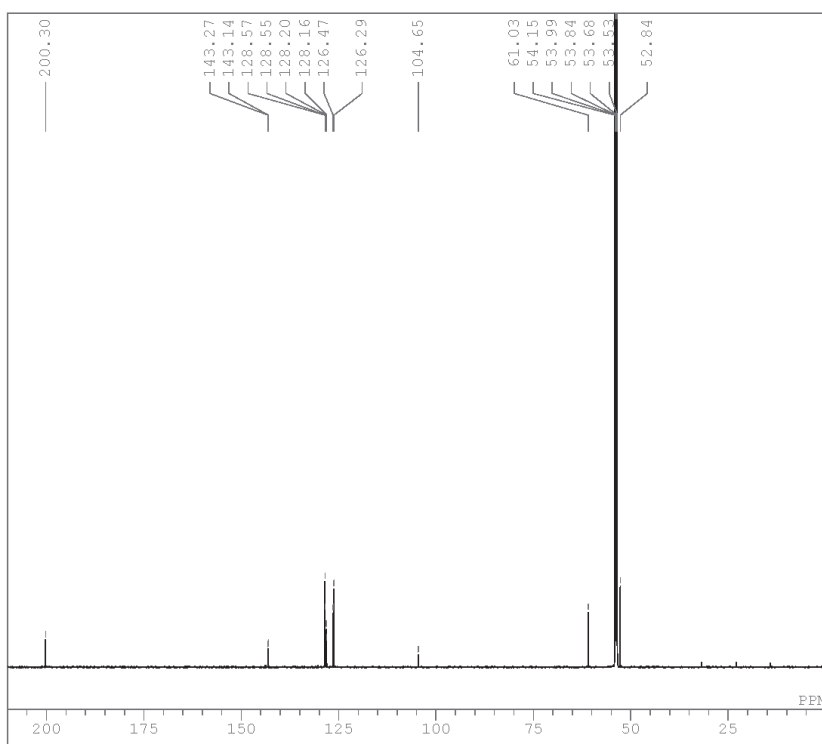

DFILE 10-13C(TD-1029).als  
 COMNT  
 DATIM 2015-11-17 14:49:29  
 OBNUC 13C  
 EXMOD zgpg30  
 OBFRQ 176.06 MHz  
 OBSET 5.43 KHz  
 OFFIN 2.48 Hz  
 POINT 32768  
 FREQU 41666.67 Hz  
 SCANS 10000  
 ACQTM 0.0000 sec  
 ED 0.0000 sec  
 FW1 10.00 usec  
 IRNUC  
 CTEMP 24.9 c  
 SLVNT CD2C12  
 EXREF 53.84 ppm  
 BF 1.00 Hz  
 RGAIN 203

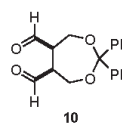

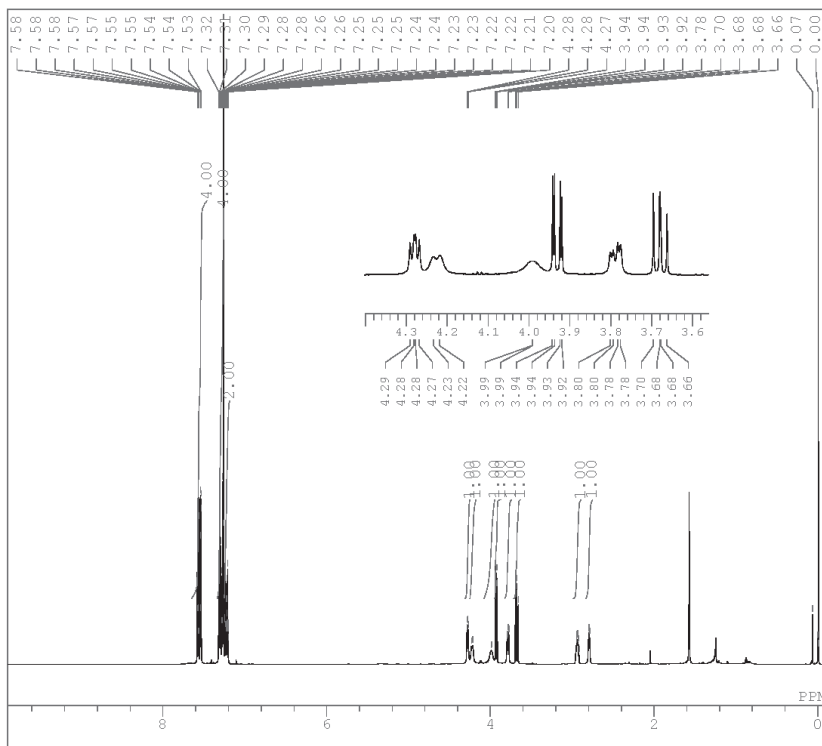

DFILE 11-1H(lactone).als  
 COMNT 20130409  
 DATIM 2013-04-09 11:24:14  
 OBNUC 1H  
 EXMOD zg30  
 OBFRQ 700.13 MHz  
 OBSET 4.32 KHz  
 OBFIN 3.59 Hz  
 POINT 32768  
 FREQU 14097.74 Hz  
 SCANS 16  
 ACQTM 2.3243 sec  
 ED 1.0000 sec  
 Fw1 9.23 usec  
 IRNUC  
 CTEMP 24.9 c  
 SLVNT CDC13  
 EXREF 0.00 ppm  
 BF 0.30 Hz  
 RGAIN 12

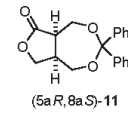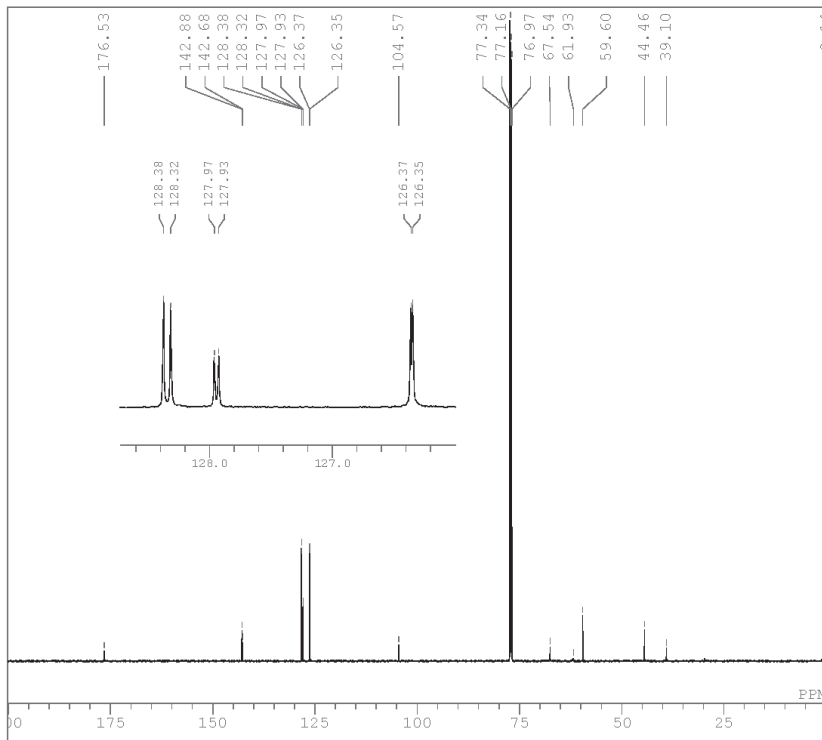

DFILE 11-13C.als  
 COMNT 20130409  
 DATIM 2013-04-09 11:50:04  
 OBNUC 13C  
 EXMOD zgpg30  
 OBFRQ 176.06 MHz  
 OBSET 5.43 KHz  
 OBFIN 2.48 Hz  
 POINT 32768  
 FREQU 41666.67 Hz  
 SCANS 512  
 ACQTM 0.7843 sec  
 ED 2.0000 sec  
 Fw1 11.98 usec  
 IRNUC  
 CTEMP 24.9 c  
 SLVNT CDC13  
 EXREF 77.16 ppm  
 BF 1.00 Hz  
 RGAIN 203

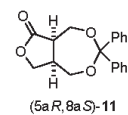

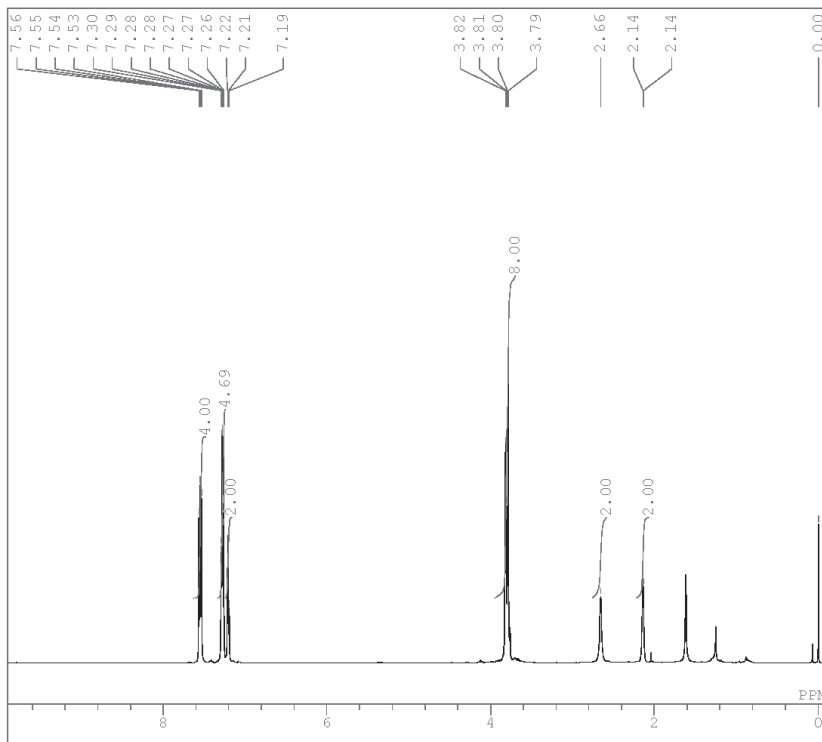

DFILE 12-1H(I-06-198-F2-3\_Proton-  
 COMNT I-06-198-F2-3  
 DATIM 2015-10-23 15:12:56  
 OBNUC 1H  
 EXMOD proton.jxp  
 OBFRQ 600.17 MHz  
 OBSET 5.30 KHz  
 OBFIN 5.47 Hz  
 POINT 13107  
 FREQU 9009.01 Hz  
 SCANS 16  
 ACQTM 1.4549 sec  
 PD 5.0000 sec  
 FW1 9.00 usec  
 IRNUC 1H  
 CTEMP 20.0 c  
 SLVNT CDCL3  
 EXREF 0.00 ppm  
 BF 1.00 Hz  
 RGAIN 44

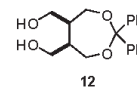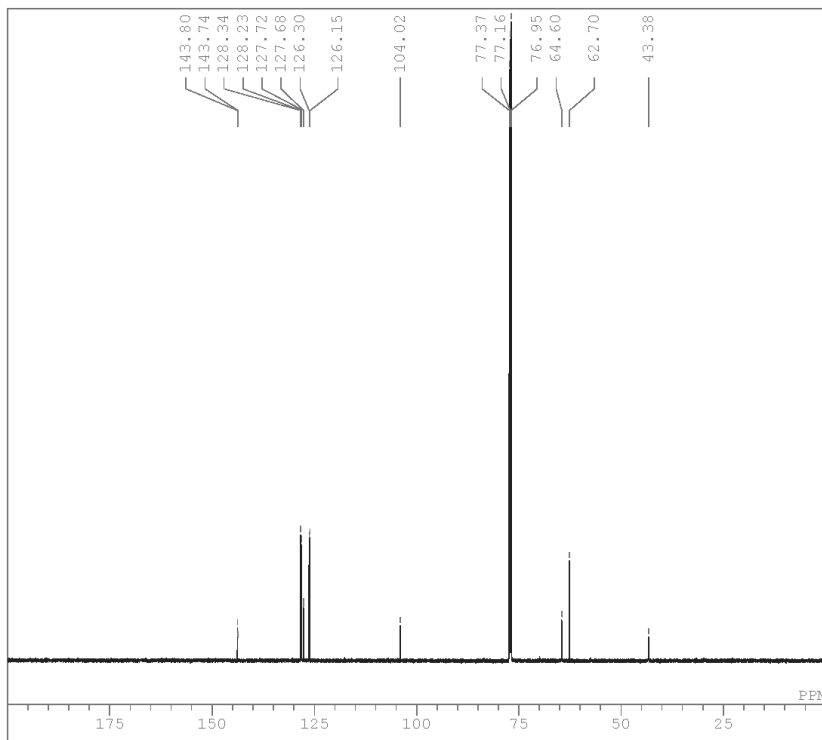

DFILE 12-13C(I-06-198-F2-3\_Proton-  
 COMNT single pulse decoupled gate  
 DATIM 2015-10-23 15:14:53  
 OBNUC 13C  
 EXMOD carbon.jxp  
 OBFRQ 150.92 MHz  
 OBSET 8.52 KHz  
 OBFIN 1.74 Hz  
 POINT 26214  
 FREQU 37878.79 Hz  
 SCANS 1024  
 ACQTM 0.6921 sec  
 PD 2.0000 sec  
 FW1 3.53 usec  
 IRNUC 1H  
 CTEMP 20.5 c  
 SLVNT CDCL3  
 EXREF 77.16 ppm  
 BF 1.00 Hz  
 RGAIN 50

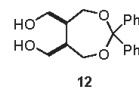

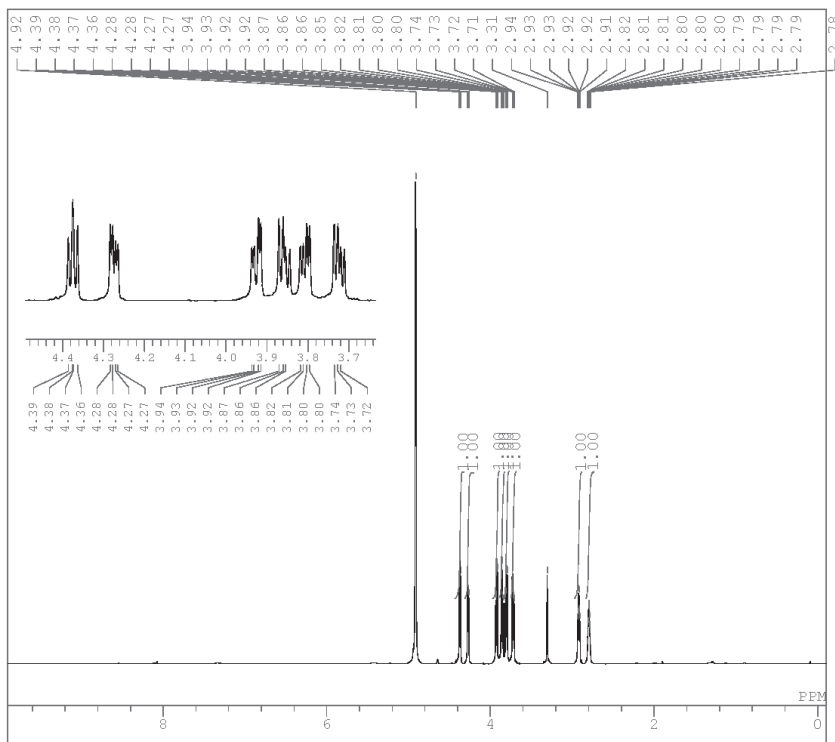

DFILE 14-cis-1H(YA1367f11-13).als  
 COMNT YA-1367f11-13  
 DATIM 2019-03-05 15:08:29  
 OBNUC 1H  
 EXMOD zg30  
 OBFRQ 700.13 MHz  
 OBSET 4.20 KHz  
 OBFIN 0.78 Hz  
 POINT 32768  
 FREQU 10504.20 Hz  
 SCANS 16  
 ACQTM 3.1195 sec  
 ED 1.0000 sec  
 PW1 9.23 usec  
 IRNUC  
 CTEMP 24.9 c  
 SLVNT MeOD  
 EXREF 3.31 ppm  
 BF 0.30 Hz  
 RGAIN 11

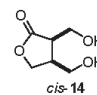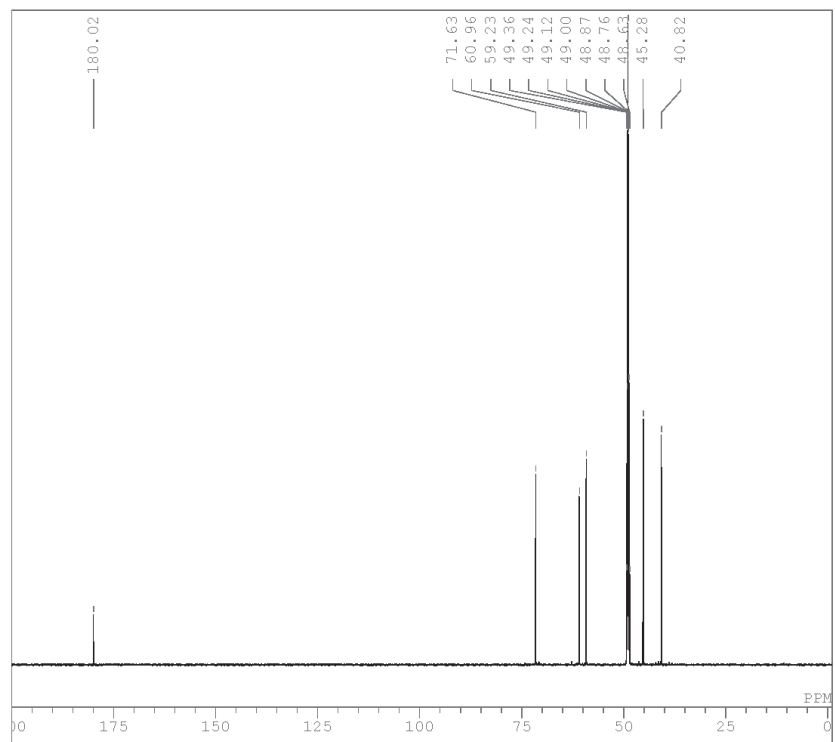

DFILE YA1367f11-13.als  
 COMNT YA-1367f11-13  
 DATIM 2019-03-05 15:33:10  
 OBNUC 13C  
 EXMOD zgpg30  
 OBFRQ 176.06 MHz  
 OBSET 5.43 KHz  
 OBFIN 3.31 Hz  
 POINT 32768  
 FREQU 42613.64 Hz  
 SCANS 512  
 ACQTM 0.7668 sec  
 ED 2.0000 sec  
 PW1 11.98 usec  
 IRNUC  
 CTEMP 24.9 c  
 SLVNT MeOD  
 EXREF 49.00 ppm  
 BF 1.00 Hz  
 RGAIN 203

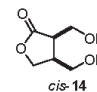

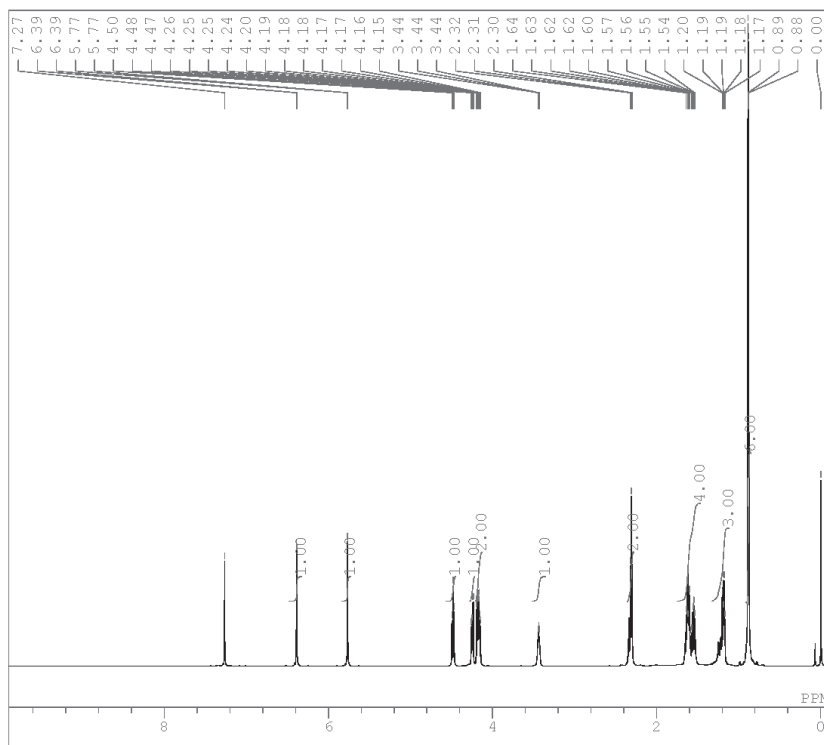

DFILE I-06-041-PURE\_Proton-1-1.a  
 COMNT single\_pulse  
 DATIM 2015-04-18 15:22:20  
 OBNUC 1H  
 EXMOD proton.jxp  
 OBFREQ 600.17 MHz  
 OBSETE 5.30 KHz  
 OBFIN 5.47 Hz  
 POINT 13107  
 FREQU 9009.01 Hz  
 SCANS 16  
 ACQTM 1.4549 sec  
 PD 5.0000 sec  
 FWL 5.80 usec  
 IRNUC 1H  
 CTEMP 17.3 c  
 SLVNT CDCL3  
 EXREF 0.00 ppm  
 BF 1.00 Hz  
 RGAIN 40

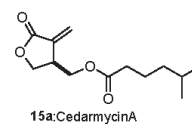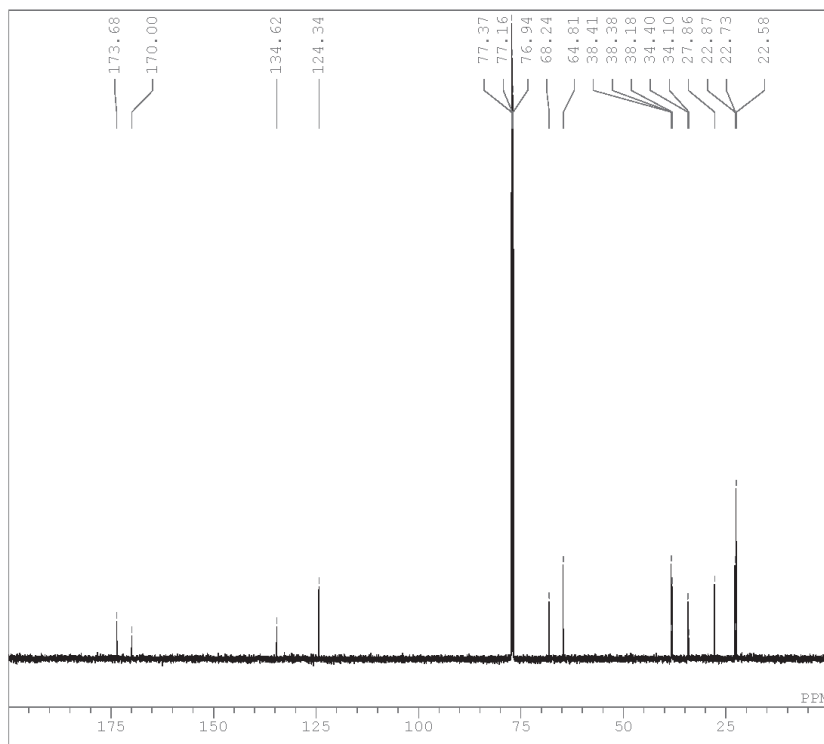

DFILE I-06-041-PURE\_Carbon-1-1(9a  
 COMNT single\_pulse\_decoupled\_gate  
 DATIM 2015-04-18 15:35:47  
 OBNUC 13C  
 EXMOD carbon.jxp  
 OBFREQ 150.92 MHz  
 OBSETE 8.52 KHz  
 OBFIN 1.74 Hz  
 POINT 26214  
 FREQU 37878.79 Hz  
 SCANS 1024  
 ACQTM 0.6921 sec  
 PD 2.0000 sec  
 FWL 4.60 usec  
 IRNUC 1H  
 CTEMP 18.4 c  
 SLVNT CDCL3  
 EXREF 77.16 ppm  
 BF 1.00 Hz  
 RGAIN 50

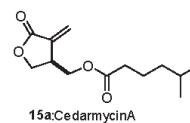

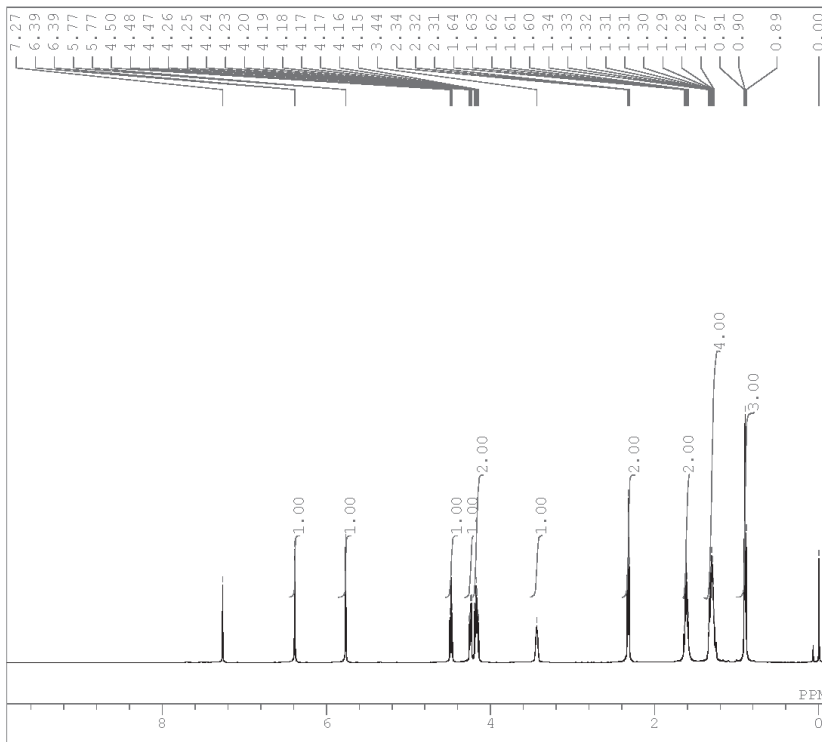

DFILE I-05-146-PURE 2\_Proton-1-1  
 COMNT single\_pulse  
 DATIM 2015-01-20 22:57:34  
 OBNUC 1H  
 EXMOD proton.jxp  
 OBFRQ 600.17 MHz  
 OBSEI 5.30 KHz  
 OBFIN 5.47 Hz  
 POINT 13107  
 FREQU 9009.01 Hz  
 SCANS 16  
 ACQTM 1.4549 sec  
 PD 5.0000 sec  
 FW1 6.50 usec  
 IRNUC 1H  
 CTEMP 16.9 c  
 SLVNT CDCL3  
 EXREF 0.00 ppm  
 BF 1.00 Hz  
 RGAIN 46

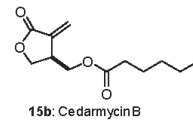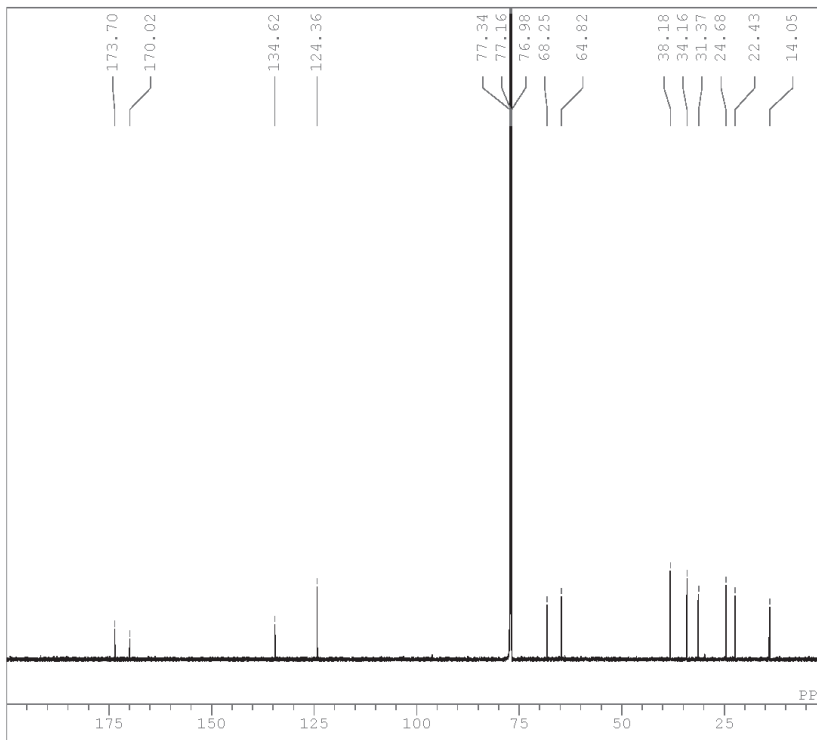

DFILE 1r  
 COMNT  
 DATIM 2015-03-17 23:09:43  
 OBNUC 13C  
 EXMOD zgpg30  
 OBFRQ 176.06 MHz  
 OBSEI 5.43 KHz  
 OBFIN 2.48 Hz  
 POINT 32768  
 FREQU 41666.67 Hz  
 SCANS 1024  
 ACQTM 0.0000 sec  
 PD 0.0000 sec  
 FW1 10.00 usec  
 IRNUC  
 CTEMP 24.9 c  
 SLVNT CDCL3  
 EXREF 77.16 ppm  
 BF 0.10 Hz  
 RGAIN 203

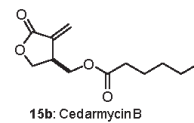

Supplement: d1ra00915j1.pdf [file d1ra00915j1.pdf]
